# **Epicatechin modulates stress-resistance in *C. elegans* via Insulin/IGF-1 signaling pathway**

Begoña Ayuda-Durán<sup>1</sup>, Susana González-Manzano<sup>1</sup>, Antonio Miranda-Vizuite<sup>2</sup>,  
Montserrat Dueñas<sup>1</sup>, Celestino Santos-Buelga<sup>1\*</sup>, Ana M. González-Paramás<sup>1</sup>

<sup>1</sup>Grupo de Investigación en Polifenoles, Universidad de Salamanca, Campus Miguel de Unamuno, Salamanca, Spain

<sup>2</sup>Instituto de Biomedicina de Sevilla, Hospital Universitario Virgen del Rocío/CSIC/Universidad de Sevilla, Sevilla, Spain.

\* Corresponding author

E-mail: [csb@usal.es](mailto:csb@usal.es) (CSB)

## 1 **Abstract**

2       The nematode *Caenorhabditis elegans* has been used to examine the influence of  
3       epicatechin (EC), an abundant flavonoid in the human diet, in some stress biomarkers  
4       (ROS production, lipid peroxidation and protein carbonylation). Furthermore, the ability  
5       of EC to modulate the expression of some key genes in the insulin/IGF-1 signaling  
6       pathway (IIS), involved in longevity and oxidative or heat shock stress response, has also  
7       been explored. The final aim was to contribute to the elucidation of the mechanisms  
8       involved in the biological effects of flavonoids. The results showed that EC-treated wild-  
9       type *C. elegans* exhibited increased survival and reduced oxidative damage of  
10       biomolecules when submitted to thermal stress. EC treatment led to a moderate  
11       elevation in ROS levels, which might activate endogenous mechanisms of defense  
12       protecting against oxidative insult. The enhanced stress resistance induced by EC was  
13       found to be mediated through the IIS pathway, since assays in *daf-2*, *age-1*, *akt-1*, *akt-*  
14       *2*, *sgk-1*, *daf-16*, *skn-1* and *hsf-1* loss of function mutant strains failed to show any heat-  
15       resistant phenotype against thermal stress when treated with EC. Consistently, EC  
16       treatment upregulated the expression of some stress resistance associated genes, such  
17       as *gst-4*, *hsp-16.2* and *hsp-70*, which are downstream regulated by the IIS pathway.

18

## 19 Introduction

20 Flavan-3-ols, such as epicatechin (EC), catechin (C) and their oligomers, the  
21 procyanidins, represent a major class of secondary polyphenolic plant metabolites.  
22 Flavan-3-ols are among the most abundant flavonoids in the human diet and are mainly  
23 present in fruits, tea, cocoa and red wine. These compounds have been reported to  
24 exhibit a range of biochemical and pharmacological activities [1], although their precise  
25 mechanisms of action have not been yet elucidated. Traditionally it has been assumed  
26 that antioxidant and radical scavenging properties underlay their action mechanism, but  
27 currently it is not clear whether other pathways contribute to their overall effect and  
28 could be even more important than the radical scavenging properties [2].

29 Aging is a degenerative process that is receiving increasing attention in recent years.  
30 The latest theories suggest that aging is in fact a multifactorial process that is often  
31 associated with an increase of oxidative stress leading to cellular damage, as well as by  
32 gene mutation due to developmental, genetic and environmental factors [3, 4, 5].  
33 Oxidative stress is an imbalanced state in which excessive quantities of reactive oxygen  
34 species (ROS) overcome the endogenous antioxidant capacity of a biological system,  
35 leading to an accumulation of oxidative damage in a variety of biomacromolecules, such  
36 as enzymes, proteins, DNA, and lipids [6]. On the other hand, ROS have been found to be  
37 physiologically vital for signal transduction, gene regulation and redox regulation among  
38 others, implying that their complete elimination would be harmful [7].

39 *Caenorhabditis elegans* is a simple multicellular organism that constitutes an  
40 excellent model for studying mechanisms of aging because of its short lifespan, fast  
41 generation time, good molecular and genomic tools and well-defined genetic pathways

42 [8,9]. Furthermore, *C. elegans* molecular and cellular pathways are strongly conserved  
43 in relation to mammals, including humans. Comparison between human and *C. elegans*  
44 genomes confirmed that many of human genes and pathways involved in disease  
45 development are present in the worm [10]. Thus, the use of *C. elegans* offers promising  
46 possibilities for studying the influence of secondary plant compounds like flavonoids on  
47 the process of aging and human health [2].

48 The aging, metabolism and stress resistance processes are regulated by an  
49 environmental conserved insulin/IGF-I signaling (IIS) pathway (Fig 1) [3, 11].

50

51 **Fig 1. Scheme of *C. elegans* IIS pathway.**

52

53 Components of this pathway are novel candidate targets, which could provide a  
54 powerful entry point for understanding the causes of aging at the molecular level. The  
55 IIS pathway consists of DAF-2, a receptor tyrosine kinase that gets phosphorylated upon  
56 stimulation by insulin-like peptides (ILPs) and promotes the activation of a  
57 phosphatidylinositol 3-kinase signaling cascade that culminates in the phosphorylation  
58 and inactivation of DAF-16/FOXO transcription factor by promoting its nucleus-cytosol  
59 translocation [12, 13]. The inhibition of the IIS pathway by an increased DAF-18/PTEN  
60 activity, stress or reduced DAF-2 activity, leads to nuclear translocation and activation  
61 of DAF-16/FOXO, where it changes the expression of various genes. DAF-16/FOXO  
62 interacts with other transcription factors such as HSF-1 and SKN-1 that are also affected  
63 by DAF-2 [14]. These transcription factors, in turn, regulate the expression of many  
64 genes such as catalase (*ctl-1*), superoxide dismutase-3 (*sod-3*), metallothionein (*mtl-1*),  
65 bacterial pathogen defense genes (*lys-7*, *spp-1*), molecular chaperones, e.g., small heat

66 shock protein-16.2 (*hsp-16.2*) and glutathione S-transferase (*gst-4*). All of them key  
67 factors that contribute to lifespan, stress tolerance, response to pathogenic bacteria and  
68 protein misfolding suppression [15-18].

69 Therefore, mutations in DAF-2 or any of the other downstream signaling components  
70 produce the downregulation or inhibition of IIS signaling in *C. elegans* and cause several  
71 cytoprotective phenotypes, such as stress resistance (oxidative stress, thermal stress),  
72 increased pathogen resistance and long lifespan [8]. In the case of *daf-2* mutants the  
73 lifespan of the animal is increased more than double and the most remarkable issue  
74 about these (and many other) long-lived mutants is that they remain young and healthy  
75 long after wild type worms are old and decrepit [4]. Previous studies have shown that  
76 different phenolic compounds such as acacetin [19], quercetin [20, 21], epicatechin [22],  
77 epigallocatechin-3-*O*-gallate (EGCG) [23] or myricetin [24], seem to have an influence in  
78 this pathway and/or have the ability to prolong lifespan or attenuate oxidative stress.

79 In this work, besides the study of the influence of EC in the biochemical changes on  
80 wild type *Caenorhabditis elegans*, genetic analyses within a series of worm mutants of  
81 the IIS pathway (*daf-2*, *age-1*, *daf-16*, *akt-1*, *akt-2*; *sgk-1*, *hsf-1*, *skn-1*) have been carried  
82 out in order to evaluate the effects of EC on oxidative resistance. Additionally, the  
83 expression of some of these stress resistance associated genes, such as *daf-16*, *skn-1*  
84 *hsf-1*, *hsp-16.2*, *hsp-70*, *sod-3* and *gst-4* has been determined by quantitative real-time  
85 PCR or using transgenic strains expressing fluorescent reporters. The aim of these  
86 studies is to gain further insight into the mechanisms involved in the effects of EC in  
87 aging.

88

89

## 90 **Material and methods**

### 91 **Standards and reagents**

92 (-)-Epicatechin (EC), 2'-7'-dichlorofluorescein diacetate (DCFH-DA), ampicillin sodium  
93 salt, nistatine, agar, yeast extract, fluorodeoxyuridine (FUdR), phosphate-buffered  
94 saline (PBS), cholesterol, Bradford reagent, guanidine hydrochloride (GuHCl), 2,4-  
95 dinitrophenylhydrazine (DNPH), malondialdehyde, hexanal, hexenal and 4-HNE were  
96 purchased from Sigma-Aldrich (Madrid, Spain). Dimethyl sulfoxide (DMSO) was obtained  
97 from Panreac (Barcelona, Spain) and trichloroacetic acid from Fluka Analytical (Madrid,  
98 Spain). HPLC grade acetonitrile was from Carlo Erba (Rodano, Italy). Acetic acid was from  
99 Merck (Darmstadt, Germany). Fluorescein thiosemicarbazide was from Carbosynth  
100 (Berkshire, UK)

101

### 102 **Strains and Maintenance Conditions**

103 The wild type strain N2 and the mutant strains CB1270, *daf-2* (e1370) III; TJ1052, *age-*  
104 *1*(hx546) II; CF1038, *daf-16*(mu86) I; CB1375, *daf-18*(e1375) IV; BQ1, *akt-1*(mg306) V;  
105 KQ1323, *akt-2*(tm812) *sgk-1*(ft15) X; PS3551, *hsf-1*(sy441) I; EU1, *skn-1*(zu67)  
106 IV/*nT1*[*unc-?(n754)*/*let-?*] (IV;V); CF1553, *muls84* [(*Psod-3::gfp*)]; TJ356, *zls356* [*Pdaf-*  
107 *16::daf-16::gfp*; *rol-6* (*su1006*)] IV; CL2166, *dvls19* [(*Pgst-4::gfp::NLS*; *rol-6* (*su1006*)] III;  
108 AM446, *rmls223* [*Phsp70::gfp*; *rol-6*(*su1006*)]; CL2070, *dvls70* [*Phsp-16.2::gfp*]; *rol-6*  
109 (*su1006*)], as well as the *E. coli* OP50 bacterial strain were obtained from the  
110 *Caenorhabditis* Genetics Center at the University Minnesota (Minneapolis, USA). Worms

111 were routinely propagated at 20 °C on nematode growth medium (NGM) plates with  
112 OP50 as a food source.

113 Synchronization of worm cultures was achieved by treating gravid hermaphrodites  
114 with bleach:NaOH 5N (50:50). Eggs are resistant whereas worms are dissolved in the  
115 bleach solution. The suspension was shaken with vortex during one min and kept a  
116 further minute on rest; this process was repeated five times. The suspension was  
117 centrifuged (2 min, 9500 *g*). The pellet containing the eggs was washed six times with  
118 an equal volume of buffer M9 (3 g KH<sub>2</sub>PO<sub>4</sub>, 6 g Na<sub>2</sub>HPO<sub>4</sub>, 5 g NaCl, 1 mL 1 M MgSO<sub>4</sub>, H<sub>2</sub>O  
119 to 1 L). Around 100 to 300 µL of the M9 with eggs (depending on eggs concentration)  
120 were transferred and incubated on NGM agar plates. When the worms reached the L4  
121 stage they were transferred to new plates with or without EC but also containing FUdR  
122 at a concentration of 150 µM to prevent reproduction and progeny overgrowth. The  
123 worms were transferred every 2 days to fresh plates with FUdR for the different  
124 treatments (with or without EC) until they reached the day of the assay. Epicatechin  
125 solution (200 mM) in DMSO was added to the nematode growth medium during its  
126 preparation to get a 200 µM final concentration on the plates. Control plates were also  
127 prepared without the flavonoid but containing the same volume of DMSO (0.1% DMSO,  
128 v/v).

129 In order to evaluate if the developmental stage of the worm had an influence, the  
130 different assays were carried out at different stages of development as described below.

131

## 132 **Stress Assays**

133 Oxidative stress in worms was induced by subjecting the animals to 35°C heat-shock  
134 treatment. Worms were incubated on OP50 plates with or without EC until days 10 and  
135 17 of adulthood for wild type worms, and days 2 and 9 of adulthood in mutant worms.  
136 Then they were transferred with a platinum wire to agar plates ( $\varnothing$  35 mm, 20 worms per  
137 plate) and switched to 35 °C for 6 or 8 h. The time was decided depending on the  
138 thermotolerance of the specific strain used in the assay. After that time, dead and alive  
139 nematodes were counted. Assays were performed with approximately 100 nematodes  
140 per treatment. In all mutant assays, in addition to the mutant control a parallel control  
141 using wild type worms was also included. In all cases, three independent experiments  
142 were performed. The relative rates of survival of worms after being subjected to thermal  
143 stress were expressed in relation to the untreated controls.

144

## 145 **Determination of Reactive Oxygen Species (ROS)**

146 The accumulation of ROS was evaluated periodically every two days from the 2<sup>nd</sup> day  
147 to the 17<sup>th</sup> day of adulthood in worms cultivated in presence and absence of EC. The  
148 cellular ROS were quantified by the dichlorofluorescein assay [25]. Briefly, the worms  
149 were individually transferred to a well of a 96-well plate containing 75  $\mu$ L of PBS and  
150 then exposed or not to thermal stress (2 h at 35 °C), after which 25  $\mu$ L of DFCH-DA 150  
151  $\mu$ M solution in ethanol was added to each well. The acetate groups of DFCH-DA were  
152 removed in worm cells, and the released DFCH is oxidized by intracellular ROS to yield  
153 the fluorescent dye DCF. The fluorescence from each well was measured immediately  
154 after incorporation of the reagent and every 10 minutes for 30 minutes, using 485 and  
155 535 nm as excitation and emission wavelengths, respectively. Recording of the DCF



156 fluorescence intensity with time in single worms was used as an index of the individual  
157 intracellular levels of ROS. Five independent experiments were performed per  
158 treatment, and for each experiment ROS measurements were made in at least 24  
159 individual worms. The measurements were performed in a microplate reader (FLUOstar  
160 Omega, BMG labtech).

161

## 162 **Worm homogenates**

163 Worms were grown on NMG medium until the 10<sup>th</sup> and 17<sup>th</sup> day of adulthood. Then,  
164 they were subjected to thermal stress for 5 h at 35 °C and subsequently, for each assay,  
165 animals from two plates (∅ 100 mm) were collected to a flask and resuspended in M9  
166 buffer. Suspensions were centrifuged (12,000 g, 5 min), and the worm pellet was  
167 washed with PBST (PBS + 0.01% Tween 20) twice and finally with PBS. The remaining  
168 pellet was transferred to an Eppendorf tube, resuspended in 1000 µL of PBS, and kept  
169 at -20 °C. Next, samples were stirred (Genius 3 vortex) and sonicated once during 60 s  
170 and twice for 30 s in a Cell Disruptor (Microson XL2000 100) to obtain a homogenate.  
171 For each treatment three independent experiments were performed, and in each  
172 experiment the measurements of the different variables were made in triplicate using  
173 three different worm homogenates. The protein content was determined according to  
174 the Bradford method after digestion of the homogenate [26]. The carbonylated proteins  
175 and lipid peroxidation products were further normalized to protein content to correct  
176 for differences in biomass of the different homogenates.

177

## 178 **Determination of lipid peroxidation products**

179 Lipid peroxidation products were analyzed by HPLC after derivatization with 2,4-  
180 dinitrophenylhydrazine (DNPH) based on the method described by Andreoli et al. [27].  
181 Proteins were removed from worm homogenates (350  $\mu$ L) by adding 350  $\mu$ L of 20% (v/v)  
182 trichloroacetic acid; 100  $\mu$ L of butylhydroxytoluene 10 mM dissolved in methanol was  
183 also added in order to protect the lipids. After a 15 min incubation at 4  $^{\circ}$ C, samples were  
184 centrifuged at 10,000  $g$  for 10 min at 4  $^{\circ}$ C. The supernatant was mixed with 100  $\mu$ L of 10  
185 mM DNPH in 2M HCl and incubated for 60 min at room temperature. The mixture was  
186 extracted three times with 400  $\mu$ L of chloroform and 3 pieces of molecular sieves were  
187 added to the organic phase for 30 min in order to remove possible remains of aqueous  
188 phase. The organic phase was collected and concentrated to dryness and finally  
189 resuspended in 80  $\mu$ L of acetic acid 0.2%: acetonitrile (62:38, v/v) and injected in the  
190 HPLC system. The column was a Waters Spherisorb S3 ODS-2 C8, 3  $\mu$ m (4.6 x 150 mm)  
191 and the solvents were: (A) 0.2% acetic acid, and (B) acetonitrile. The elution gradient  
192 established was: isocratic 38% B for 10 min, 38% to 75% B over 10 min, 75% to 80% B  
193 over 20 min at a flow rate of 0.6 mL/min. Malondialdehyde, 4-hydroxynonenal and cis-  
194 hexenal were used as lipid peroxidation markers. Double online detection was carried  
195 out in a DAD using 310 nm and 380 nm as preferred wavelengths, and in a mass  
196 spectrometer for compound confirmation. MS detection was performed in negative ion  
197 mode in an equipment provided by an APCI source and a triple quadrupole-ion trap mass  
198 analyzer. The APCI temperature was set at 450  $^{\circ}$ C. Lipid peroxidation products were  
199 quantified from their chromatographic peaks recorded in the DAD by comparison with  
200 calibration curves obtained by injection of increasing concentrations of  
201 malondialdehyde (310 nm), hexenal and 4-hydroxynonenal (HNE) (380 nm).

202

## 203 **Determination of carbonylated proteins**

204 Carbonylated proteins were determined by a direct reaction of protein carbonyls  
205 with fluorescein thiosemicarbazide (FTC) [28] and measured in a fluorescent semi-  
206 microplate assay. A 50  $\mu$ L of 0.2 mM of FTC was added to 50  $\mu$ L of homogenate and kept  
207 overnight. Proteins were precipitated by adding 400  $\mu$ L 20% trichloroacetic acid and  
208 centrifuged 10,000  $g$  4  $^{\circ}$ C 10 min. Afterwards, the precipitate was cleaned three times  
209 with 1 mL acetone, stirred (Genius vortex) and centrifuged for 10 min at 10,000  $g$  4  $^{\circ}$ C.  
210 The precipitates were dried and finally solubilized with 50  $\mu$ L of 6M guanidine  
211 hydrochloride (GuHCl). The samples were diluted with 450  $\mu$ L Hepes buffer 0.1 M pH 7  
212 (1.38 g  $\text{NaH}_2\text{PO}_4 \cdot \text{H}_2\text{O}$  dissolved in 100 mL of water) and measured using 100  $\mu$ L per well  
213 in triplicate in a fluorescent reader with excitation at 485 nm and emission at 520 nm.  
214 Nanomol of FTC-reacted carbonyls were calculated using a standard curve generated  
215 from the readings of various concentrations of FTC prepared in a medium similar to the  
216 one used in the samples. The levels of protein carbonyls in the homogenates were  
217 expressed as nmol/mg worm protein calculated by the Bradford method.

218

## 219 **RT-qPCR assays**

220 Adult worms were treated with or without 200  $\mu$ M of EC for 4 days. The worms were  
221 collected with M9 buffer, centrifuged at 10,000  $g$  1 min, and the pellet dissolved in 300  
222  $\mu$ L of M9. Total RNA was extracted using RNeasy Mini RNA Isolation Kit (GE Healthcare).  
223 In order to maximize cell breakage, in the first stage of the extraction 10 stainless steel  
224 beads (2 mm) were added. The mixture was vortex shaken vigorously and further  
225 homogenized in a Thermo Savant FastPrep 120 Cell Disrupter System with a speed of

226 5.5 m/s and run time duration of 10 s five times. cDNA was produced with High Capacity  
227 cDNA Reverse Transcription Kits (Applied Biosystems) using a 2 µg of total RNA per  
228 reaction. The expression of mRNA was assessed by quantitative real-time PCR, using  
229 SYBR green as the detection method. The gene expression data were analyzed using the  
230 comparative 2- $\Delta\Delta$ Ct method with *act-1* as the normalizer [29]. Nine independent  
231 experiments were performed. The following gene-specific primers were used: *act-1*  
232 CCAGGAATTGCTGATCGTATG (F) and GGAGAGGGAAGCGAGGATAG (R), *skn-1*  
233 AGTGTCGGCGTTCCAGATTTT (F) and GTCGACGAATCTTGCGAATCA (R), *daf-16*  
234 CCAGACGGAAGGCTTAAACT (F) and ATTCGCATGAAACGAGAATG (R), and *hsf-1*  
235 GAAATGTTTTGCCGCATTTT (F) and CCTTGGGACAGTGGAGTCAT (R).

236

## 237 **Fluorescence quantification and visualization**

238 Synchronized L1 larvae expressing an inducible green fluorescent protein (GFP)  
239 reporter for *gst-4*, *hsp-16.2*, *hsp-70*, *sod-3* and *daf-16* genes were grown on NMG  
240 medium in the presence or absence of EC until the day of the assay, when they were  
241 submitted or not to thermally-induced oxidative stress (35 °C, 1h). The precise day of  
242 assay was defined when a higher intensity of the fluorescence was observed after  
243 carrying out a screening with the different strains throughout the life of the worm. If no  
244 increase in the fluorescence was observed, young (day 2<sup>th</sup> of adulthood) and older adult  
245 worms (day 9<sup>th</sup> of adulthood) were exposed to the heat shock. In the cases of *hsp-16.2*  
246 and *hsp-70* reporter strains, worms were then allowed to recover in their normal  
247 environment at 20 °C for 2h or 3h, respectively before pictures were taken. The  
248 expression of *gst-4*, *hsp-16.2*, *hsp-70*, *sod-3* was measured by quantifying the  
249 fluorescence of the GFP reporter. To analyze the subcellular localization of DAF-16::GFP,

250 worms were classified as diffuse cytoplasmic, intermediate cytoplasmic/nuclear and  
251 strong nuclear translocation. Approximately 35 randomly selected worms for each  
252 experiment were mounted in a 5  $\mu$ L drop of 10 mM levamisole (except for DAF-16::GFP  
253 in 2% sodium azide) on a 3% agarose pad covered with a coverslip. All fluorescence  
254 determinations were done in an Olympus BX61 fluorescence microscope equipped with  
255 a filter set (excitation  $470\pm 20$  nm, emission  $500\pm 20$  nm) and a DP72 digital camera  
256 coupled to CellSens Software for image acquisition and analysis. ImageJ software was  
257 used to quantify fluorescence intensity. Three independent experiments were  
258 performed per assay and reporter strain.

259

## 260 **Statistical Analysis**

261 The statistical analyses were performed using the PC software package SPSS (version  
262 23.0; SPSS Inc., Chicago). ANOVA was applied for multiple comparisons of values to  
263 determine possible significant differences between treated and control groups. To  
264 analyze survival to thermal stress, contingency tables were performed and Statistical  
265 significance was calculated using the Chi Square Test. In every analysis, significant  
266 differences were statistically considered at the level of  $p < 0.05$ .

267

## 268 **Results and Discussion**

### 269 **Effects of epicatechin (EC) in stress resistance**

270 In a previous work, the effects of catechin, epicatechin, 3'-O-methylepicatechin and  
271 4'-O-methylepicatechin in *C. elegans* stress resistance were evaluated [30]. All the  
272 assayed catechins enhanced the resistance of the worm against both thermal and

273 chemically-induced oxidative stress in early stages of development (worms at 1<sup>st</sup> and 6<sup>th</sup>  
274 day of adulthood), with relatively greater protective effects in older (6<sup>th</sup> day) than in  
275 young worms. Specifically, a significant enhancement in survival was observed following  
276 thermal stress in the EC-treated nematodes (200  $\mu$ M); in the first day of adult the  
277 average proportion of living worms was 78.6% in control assay and 97.6% in treated  
278 worms while, in the 6<sup>th</sup> day of adulthood, survival rate was 89,2% in treated worms  
279 compared to 56,2% in untreated animals.

280 In the present work, the influence of EC in worm resistance to thermal stress was  
281 evaluated in more aged animals (10<sup>th</sup> and 17<sup>th</sup> day of adulthood), in order to know if the  
282 developmental stage of the animals and/ or a longer exposure time to EC further  
283 influenced the resistance against this type of stress. As shown in Fig 2, the treatment  
284 with EC resulted in a significant increase in the survival of nematodes subjected to  
285 thermal stress (8h, 35 °C). At day 10, the survival of stressed animals increased from  
286 29.9% in controls to 47.7% in worms treated with EC. Likewise, the treatment with EC  
287 increased the survival rates at day 17 from 40% in controls to 55% in worms treated with  
288 EC. These results suggest that the protective effect of EC against oxidative stress is not  
289 increased in more aged worms, as previously concluded [30]. Nevertheless, caution  
290 must be observed when interpreting these data as this aged population (10<sup>th</sup> and 17<sup>th</sup>  
291 days of adulthood) represents the more aging resistant phenotypes, a circumstance that  
292 might provide a special relevance to the increase in the percentage of survival induced  
293 by EC in older individuals.

294

295 **Fig 2. Percentages of survival following thermal stress (35 °C, 8h) applied at days 10<sup>th</sup>**  
296 **(A) and 17<sup>th</sup> of adulthood (B) in N2 wild type *C. elegans* strain not treated (controls)**

297 **and treated with EC (200  $\mu$ M in the culture media).** Three independent experiments  
298 were performed. The results are presented as the mean values $\pm$ SD. Statistical  
299 significance was calculated using the Chi Square Test. The differences were considered  
300 significant at  $*(p<0.05)$ .

301

## 302 **Effects of EC in intracellular ROS levels**

303 Intracellular ROS were determined in *C. elegans* grown in NGM media with and  
304 without EC (200  $\mu$ M) and exposed or not to thermal stress (35  $^{\circ}$ C, 2h). ROS assessment  
305 was performed every two or three days throughout the life of the worms and the  
306 obtained results are shown in Fig 3.

307

308 **Fig 3. Levels of intracellular ROS in *C. elegans* subjected (B) or not (A) to thermal stress**  
309 **(35  $^{\circ}$ C, 2h) grown in the absence (controls) or presence of EC (200  $\mu$ M in the culture**  
310 **media).** ROS levels were evaluated at different stages of development throughout the  
311 entire life of the worm. Five independent experiments were performed. The results are  
312 presented as the mean values  $\pm$  SEM. Statistical significance was calculated using one-  
313 way analysis of variance ANOVA. The differences were considered significant at  
314  $*(p<0.05)$ .

315

316 As expected, a progressive increase in ROS levels was produced as the animals grows  
317 older and higher ROS levels were found in thermally stressed animals than in those not  
318 subjected to stress. Regarding the effect of EC, a different behavior was observed  
319 between younger and older individuals. Thus, up to day 9 of adulthood, similar or slightly

320 lower ROS levels were determined in animals treated with EC than in non-treated  
321 controls. This observation was in agreement with previous studies where *C. elegans* was  
322 grown with and without EC up to the sixth day of adulthood [22]. However, from day 9  
323 onwards this trend was inverted and higher ROS values were determined in worms  
324 grown in the presence of EC than in their corresponding controls, either submitted or  
325 not to thermal stress. In previous studies on the influence of EC in *C. elegans* longevity  
326 [30], an increase in the survival rate was observed in the worms treated with EC from  
327 day 14<sup>th</sup> onwards, which approximately coincides with the time point where ROS levels  
328 become higher in the individuals treated with EC in both populations in the assays now  
329 performed (Fig 3).

330 The physiological effects of ROS levels within an organism remains unresolved.  
331 According to the free radical theory of aging [31], the cause of aging is the accumulation  
332 of molecular damage due to the production of toxic reactive oxygen species during  
333 cellular respiration. Nevertheless, although it is clear that oxidative damage increases  
334 with age, studies both in invertebrate (worms and flies) or mammals (mice) have  
335 suggested that oxidative stress may not be the only cause of aging or at least not  
336 according to the classical conception [5, 32, 33]. Indeed, an increasing number of studies  
337 seem to contradict the free radical theory, including studies carried out in *C. elegans*  
338 where longer lifespan was found in worms with higher concentrations of ROS. Lee et al,  
339 [34] showed that the mild increase in ROS levels induced by the inhibition of respiration  
340 in *C. elegans* stimulates HIF-1 to activate gene expression and promote longevity. These  
341 same authors observed that low paraquat levels, an oxygen free radical generating  
342 compound, increased worm lifespan significantly whereas higher concentrations of  
343 paraquat decreased it in a dose-dependent manner. Similarly, Heidler et al, [35]



344 observed that exposure to high concentrations of juglone, another superoxide-  
345 generating compound, led to premature worm death but low concentrations prolonged  
346 life. In that study, lifespan extension was associated with an increased expression of  
347 small heat-shock protein HSP-16.2, enhanced glutathione levels and nuclear  
348 translocation of DAF-16. Based on the observations above, Van Raamsdonk and Hekimi  
349 [36] proposed that *C. elegans* lifespan resulted from a balance between pro-survival  
350 ROS-mediated signaling and ROS toxicity. According to those authors, superoxide was  
351 not a simply toxic byproduct of metabolism, but it is involved in a type of ROS-mediated  
352 signaling that can result in increased longevity.

353 More recently, Meng et al, [37] studied the differential responses to oxidative stress  
354 in young and old individuals using *C. elegans* and human fibroblasts. They proposed a  
355 new concept called "Redox-stress Response Capacity (RRC)", according to which cells or  
356 organisms are capable of generating dynamic redox responses to activate cellular  
357 signaling and to maintain cellular homeostasis. This response would be higher in young  
358 individuals generating more ROS and activating signaling pathways and with a better  
359 ability to degrade damaged proteins by up-regulating chaperones. That explanation  
360 might give an answer to our and others observations regarding the differential effects  
361 of EC on ROS production and *C. elegans* survival depending on worm life stage.

362 Taken together, and in agreement with what has been proposed by other authors [5,  
363 35, 38], the results obtained herein seem to reinforce the emerging idea that mild  
364 increase in ROS levels may have beneficial effects. This might involve different  
365 mechanisms, such as induction in the expression of protective cellular pathways,  
366 activation of repair mechanisms or changes in respiration.

367

368 **Oxidative damage: Protein carbonylation and products of lipid**  
369 **peroxidation**

370 In order to evaluate whether the treatment with EC had an influence on the level of  
371 oxidative damage in *C. elegans*, carbonylated proteins and lipid peroxidation products  
372 were determined in wild type worms grown in the presence and absence of EC (200  $\mu$ M)  
373 and subjected to thermal stress at 10<sup>th</sup> and 17<sup>th</sup> day of adulthood.

374 Carbonylated proteins are commonly used as a biomarker of protein oxidation in cells  
375 and tissues and high levels of them have been related to loss of cell viability. The  
376 oxidation status of proteins was quantified after the reaction of the carbonyl groups  
377 with fluorescein-thiosemicarbazide (FTC) adapting the method proposed by Chaudhuri  
378 et al, [28] to *C. elegans*. The results were expressed as nmol of carbonylated proteins by  
379 mg of worm protein. As shown in Fig 4A.1 and 4A.2) a slight decrease was observed in  
380 the levels of protein carbonylation in worms treated with EC both at days 10<sup>th</sup> and 17<sup>th</sup>.  
381 Although the differences were not significant ( $p > 0.05$ ), the levels of carbonylated  
382 proteins were never higher in the worms treated with EC with respect to untreated  
383 animals. This observation suggested that exposure to EC did not lead to an increase in  
384 the oxidative damage despite enhanced ROS levels were determined in treated worms  
385 than in controls (Fig 3).

386

387 **Fig 4. Levels of (A) carbonylated proteins and (B) lipid peroxidation products after**  
388 **cultivation of *C. elegans* in the absence (controls) and presence of EC (200  $\mu$ M) and**  
389 **subjected to thermal stress.** The results were obtained at days 10<sup>th</sup> (A.1 and B.1) and  
390 17<sup>th</sup> (A.2 and B.2) of worm adulthood. Three independent experiments were performed.

391 The results are presented as the mean values  $\pm$  SEM. Statistical significance was  
392 calculated using one-way analysis of variance (ANOVA). The differences were considered  
393 significant at  $*(p<0.05)$ .

394

395 High ROS levels may attack polyunsaturated fatty acids in membrane and free lipids  
396 leading to oxidative lipid degradation. Some common products of this process are  
397 malondialdehyde (MDA), 4-hydroxynonenal (4-HNE) and cis-hexenal, which have been  
398 used as lipid peroxidation markers in the present study. In Fig 4 (B.1 and B.2) it can be  
399 observed that a descent was produced in the levels of these peroxidation products in  
400 the worms treated with EC with respect to untreated animals in both days of the assay,  
401 although only the decline of MDA was significant. Thus, as for carbonylated proteins,  
402 the increased ROS levels determined in the worms treated with EC (Fig 3) did not result  
403 in an increase in lipid peroxidation, as evaluated by the analyzed markers.

404 Lipid peroxidation can cause loss of membrane integrity and subsequent cell death.  
405 Thereby, the observed decrease in lipid peroxidation might explain the increased  
406 survival rate and longer life duration in worms treated with EC submitted to thermal  
407 stress. This could indicate that chronic exposure to this flavonoid confers protection  
408 against oxidative damage, an effect that would be especially evident in later stages of  
409 the life of *C. elegans*, as deduced from the observations made in the longevity and  
410 thermal stress resistance assays.

411 In view of these findings, it could be suggested that the moderate increase ROS levels  
412 provoked by the treatment with EC in *C. elegans* leads to a compensatory response,  
413 inducing some endogenous antioxidant and other protection mechanisms, which would  
414 result in greater resistance to oxidative stress. As proposed by Xiong et al. [38] for similar

415 results in worms treated with EGCG, this type of response could be explained by a  
416 specific process of hormesis, the mitohormesis. While hormesis refers to a biphasic dose  
417 response to an environmental agent or chemical agent characterized by a low dose  
418 adaptive beneficial effect and a high dose toxic effect, the mitohormesis is the hormetic  
419 reaction in response to mitochondrial ROS, by which a high but sub-lethal level of free  
420 radical production that can stimulate resistance to ROS damage and increase longevity  
421 [39]. A support to this assumption can be found in the observations made by Lapointe  
422 and Hekimi and Lapointe et al. [5,40] in long-lived *Mclk1*<sup>+/-</sup> mice, with a dysfunction in  
423 the activity of CLK-1/MCLK1, a mitochondrial enzyme necessary for ubiquinone  
424 synthesis, which showed a significant attenuation in the rate of development of  
425 oxidative biomarkers of aging (protein carbonylation, lipid peroxidation and 8-OHdG as  
426 a biomarker of DNA damage) despite they exhibited a substantial increase in oxidative  
427 stress. Reduced activity of CLK-1/MCLK1 has also been shown to prolong average and  
428 maximum lifespan in *C. elegans* [40].

429

## 430 **Influence of EC on genes involved in oxidative stress resistance**

431 The idea that flavonoids do not act in the organism only as conventional antioxidants  
432 but could also modulate multiple cellular pathways is currently gaining strength [41].  
433 The IIS pathway contributes to longevity and oxidative or heat shock stress response and  
434 it encompasses highly conserved components from nematodes to mammals, including  
435 humans [18]. Some authors have reported that several classes of flavonoids seem to  
436 influence this pathway [42-44]. However, although there are many works about the  
437 beneficial effects of different flavan-3-ols and flavan-3-ol-rich extracts in different

438 organisms including humans, the molecular mechanisms involved in such effects have  
439 not been sufficiently studied.

440 In the present work, those molecular mechanisms have been explored by checking  
441 the ability of EC to modulate the stress resistance in mutant worms for different genes  
442 of the IIS pathway and genes that are relevant to stress resistance. The premise of these  
443 assays was that EC treatment would not increase the survival of nematodes lacking  
444 specific genes that are required for the protection against oxidative damage induced by  
445 submitting worms to thermal stress. The stress resistance has been studied in mutant  
446 worms at 2<sup>nd</sup> and 9<sup>th</sup> day of adulthood, in order to check whether the results could be  
447 different according to the developmental stage. Thus, young adults in reproductive age  
448 and older adults in post-reproductive age were chosen. Furthermore, the effect of EC  
449 on the expression of some of these genes by RT-qPCR in EC-treated worms grown under  
450 non-stress conditions and after thermal stress was also investigated.

451 DAF-2 is the *C. elegans* homologue for the insulin/IGF-1 receptor. Activation of DAF-  
452 2 leads to phosphorylation and cytoplasmic sequestration of the DAF-16 transcription  
453 factor via AGE-1, PDK-1, AKT-1, AKT-2, and SGK-1 kinases [2]. Herein, the influence of EC  
454 on the resistance to thermally-induced stress was checked in *age-1*, *akt-1*, *akt-2*; *sgk-1*  
455 and *daf-2* loss of function mutant strains and we found that the treatment with the  
456 flavonoid did not lead to significant enhancement in the stress resistance in any of these  
457 mutant strains (Fig 5). This result suggests that those genes could be required to explain  
458 the mechanisms involved in the effects of the studied flavonoid on improving the  
459 resistance against thermal/oxidative stress in *C. elegans* and also that the resistance to  
460 stress mediated by EC involves the IIS pathway. Nevertheless, it is also necessary to take  
461 into account that these mutants are long-lived and already more resistant to stress than

462 wild type worms, which might mask a possible increase in the survival of the stressed  
463 animals produced by EC.

464

465 **Fig 5. Percentages of survival following thermal stress applied at days 2<sup>nd</sup> and 9<sup>th</sup> of**  
466 **adulthood in different long-lived *C. elegans* mutants from the IIS pathway cultivated**  
467 **in the absence (controls) and presence of EC (200  $\mu$ M) in the culture media.** Three  
468 independent experiments were performed. The results are presented as the mean  
469 values $\pm$ SD. Statistical significance was calculated using the Chi Square Test. The  
470 differences were considered significant at  $*(p<0.05)$ .

471

472 Proper regulation of IIS is crucial for the protection of *C. elegans* from both external  
473 and internal stresses [14]. The key downstream transcription factors of IIS pathway that  
474 contribute to longevity and regulate the resistance to a variety of stress include DAF-  
475 16/FOXO, HSF-1 and SKN-1 [14]. Thus, we examined the oxidative stress resistance of  
476 loss-of-function *daf-16*, *hsf-1* and *skn-1* mutant worms treated with EC. The results  
477 showed that treatment with EC did not increase the survival of these mutants (Fig 6),  
478 suggesting that these genes are required for EC-mediated enhanced thermal stress  
479 resistance in *C. elegans*. Similar results were obtained for both young adults (day 2) and  
480 older worms (day 9).

481

482 **Fig 6. Percentage of survival following thermal stress applied at days 2<sup>nd</sup> (A, C and D)**  
483 **and 9<sup>th</sup> (B, D and F) of adulthood in *daf-16(mu86)*, *hsf-1(sy441)* and *skn-1(zu67)***  
484 **mutants cultivated in the absence (controls) and presence of EC (200  $\mu$ M) in the**  
485 **culture media.** Three independent experiments were performed. The results are

486 presented as the mean values $\pm$ SD. Statistical significance was calculated using the Chi  
487 Square Test. D The differences were considered significant at  $*(p<0.05)$ .

488

489 Contrary to our observations, Saul et al. [45] found that 200  $\mu$ M of catechin  
490 significantly prolonged the lifespan in *age-1* and *daf-16* mutants, indicating that AGE-1  
491 and DAF-16 would not be required for the life-extending effect of this flavan-3-ol.  
492 However, no significant lifespan extension was observed in *akt-2* mutants, suggesting  
493 that AKT-2 was at least partly involved in the catechin mediated longevity. Those authors  
494 concluded that the IIS-pathway was not required for the life extending effect of catechin  
495 and that the results obtained for AKT-2 could be explained because of a possible AKT-2  
496 function independent of IIS pathway. On the contrary, Cai et al. [46] reported that the  
497 lifespan extension effect of the flavonol icaricide II was dependent on the IIS pathway,  
498 since *daf-16* and *daf-2* loss-of-function mutants failed to show any lifespan extension  
499 upon treatment with this compound.

500 DAF-16, a FOXO-family transcription factor, influences the rate of aging in response  
501 to insulin/insulin-like growth factor (IGF-1) signalling by upregulating a wide variety of  
502 genes including cellular stress-response, lifespan, antimicrobial and metabolic genes  
503 [18]. As above discussed, the treatment with EC did not enhance resistance to thermal  
504 stress of *daf-16(mu86)* mutants worms, either at days 2 or 9 of adulthood (Fig 6 A and  
505 B), pointing to DAF-16 being involved in EC activity. In order to obtain further support to  
506 this assumption, the effect of EC on *daf-16* expression in wild-type *C. elegans* under  
507 normal growth conditions and after thermal stress exposure was examined by RT-qPCR.  
508 It was found that *daf-16* mRNA levels were enhanced in worms grown in the presence  
509 of 200  $\mu$ M of epicatechin, both subjected and not to thermal stress, although this

510 increase was only significant in worms grown under non-stressed conditions (Fig 7A and  
511 7B). These results support the idea of DAF-16 playing a key role in the effects produced  
512 by EC in worms.

513

514 **Fig 7. Effect of EC on the expression of *daf-16*, *hsf-1* and *skn-1* genes in wild-type *C.***  
515 ***elegans* cultivated in the absence (controls) and presence of EC (200  $\mu$ M) in the culture**  
516 **media grown under non-stressed conditions (A) or after subjecting them to thermal**  
517 **stress (B). The expression level was determined by RT-qPCR; *act-1* was used as an**  
518 **internal control. Nine independent experiments were performed. The results are**  
519 **presented as the mean values  $\pm$  SEM. Statistical significance was calculated using by one-**  
520 **way analysis of variance ANOVA The differences were considered significant at**  
521 **(\* $p$ <0.05).**

522

523 HSF-1 is a transcription factor that regulates heat shock response and also has an  
524 influence in aging [17]. As for *daf-16*, the expression of *hsf-1* was quantified in wild type  
525 worms under normal growth conditions and after thermal stress. The results showed an  
526 increase in the expression of this transcription factor in both conditions although the  
527 increase was only significant only in thermal stress conditions (Fig 7A and B). These  
528 results, together with the fact that EC did not increase the resistance to thermal stress  
529 of *hsf-1* mutants (Fig 6C and D), could indicate that *hsf-1* is also involved in the effects  
530 produced by EC in the worms. Similar observations were made regarding SKN-1  
531 homologue of Nrf-2 transcription factor, which regulates lifespan and oxidative stress  
532 response by mobilizing the conserved phase 2 detoxification response [16]. In this case,  
533 RT-qPCR experiments showed that EC significantly increased the expression of *skn-1*



534 under stress but not in normal growth conditions (Fig 7A and B). These results, together  
535 with the survival assays in which no significant increase was observed in the survival of  
536 EC-treated *skn-1(zu67)* mutants compared to control worms (Fig 6E and F), also  
537 suggested the involvement of SKN-1 in the effects of EC. Altogether, these results  
538 indicated that the improvement in stress resistance produced by EC involves the IIS  
539 pathway by regulating the expression of *daf-16*, *hsf-1* and *skn-1* genes independently of  
540 the worm age.

541 In line with the results obtained herein, higher resistance to oxidative stress and  
542 increased lifespan was found in *C. elegans* treated with a flavonoid-enriched cocoa  
543 powder that contained catechin, epicatechin and procyanidins, which was explained to  
544 be mediated by the IIS pathway and sirtuin proteins [42]. Similar studies with  
545 chlorogenic acid also concluded that this polyphenol activates the transcription factors  
546 DAF-16, HSF-1, SKN-1 and HIF-1, although not SIR-2.1 [47]. By contrast, Saul et al [48]  
547 found that the forkhead transcription factor DAF-16 was not essential for quercetin  
548 effects on longevity and stress resistance. The same group showed that quercetin-  
549 mediated lifespan extension was neither a caloric restriction mimetic effect nor a sirtuin  
550 (*sir-2.1*) dependent process, but it was modulated by four genes: *age-1*, *daf-2*, *unc-43*  
551 and *sek-1*, identified as a likely mode of action [20]. These observations might indicate  
552 that different mechanisms of action could be involved in the effects on longevity and  
553 stress resistance induced by different polyphenols.

554

555 **Effect of epicatechin on DAF-16 subcellular localization and**  
556 **expression of GST-4, HSP-16.2, HSP-70 and SOD-3**

557 In order to delve into the molecular mechanisms involved in the stress and lifespan  
558 modulation, the effect of EC on the expression of the specific cellular stress response  
559 genes *sod-3* (superoxide dismutase), *gst-4* (glutathione-S-transferase), *hsp-16.2* and  
560 *hsp-70* (heat-shock proteins) was explored. SOD-3 is an antioxidant enzyme that  
561 protects against oxidative stress by catalysing the removal of superoxide. The gene *sod-3*  
562 is thought to be a direct target of DAF-16 as the *sod-3* promoter contains consensus  
563 DAF-16/FOXO-binding elements (DBEs) [49]. GST-4 enzyme is involved in the Phase II  
564 detoxification pathway, playing an important role in resistance to oxidative stress; its  
565 expression is mediated by SKN-1 [50]. Heat shock proteins (HSP) are induced in response  
566 to thermal and other environmental stresses. The expression of *hsp* genes is mainly  
567 regulated by heat shock transcription factor (HSF-1), which is also influenced by the IIS  
568 pathway in *C. elegans* [2]. For this study, transgenic strains expressing GFP under the  
569 control of *gst-4*, *sod-3*, *hsp-16.2* and *hsp-70* promoters were used. Also, a transgenic  
570 strain expressing a fusion protein DAF-16::GFP was used to examine whether EC  
571 treatment activated DAF-16 nuclear translocation under normal and stress conditions.  
572 EC (200  $\mu$ M) was found to significantly enhance the expression levels of GST-4, HSP-16.2  
573 and HSP-70, whereas no differences existed in the expression of SOD-3 (Fig 8). GFP  
574 expression levels were determined under non-stressed conditions for *gst-4* and *sod-3*,  
575 reporters while for *hsp-16.2* and *hsp-70* reporters, worms had to be previously subjected  
576 to a heat shock (35  $^{\circ}$ C, 1h) and further let to recover at 20  $^{\circ}$ C for 2h (*hsp-16.2*) or 3h  
577 (*hsp-70*). For *hsp-16.2* and *hsp-70* reporter strains fluorescence was hardly detected  
578 before heat stress and no differences between the control and EC-treated worms were  
579 observed (Fig S1). Regarding DAF-16, EC treatment failed to induce DAF-16::GFP nuclear  
580 translocation respect to the control under both in unstressed or under stress conditions

581 (Fig 9). As a short thermal stress (35 °C, 1h) of the DAF-16::GFP reporter strain is enough  
582 to provoke DAF-16 nuclear translocation, it is difficult to observe possible differences  
583 induced by the treatment with EC.

584

585 **Fig 8. Effect of EC on the expression of GST-4, SOD-3, HSP-16.2 and HSP-70 in *C.elegans*.**

586 Age-synchronized L1 transgenic worms of *Pgst-4::gfp*, *Psod-3::gfp*, *Phsp-16.2::gfp* and  
587 *Phsp-70::gfp* reporter strains were cultivated in the absence (controls) and presence of  
588 EC (200 µM) in the culture media. **A)** Representative fluorescence images of control and  
589 EC-treated worm strains stress response. **B)** Relative fluorescence intensities of  
590 transgenic worms. Total GFP fluorescence of each whole worm was quantified using  
591 Image J software. Three independent experiments were performed. The results are  
592 presented as the mean values ± SEM. Approximately 35 randomly selected worms from  
593 each set of experiments were examined. Differences compared with the control (0 µM,  
594 0.1% DMSO) were considered statistically significant at  $p < 0.05$  (\*) and  $p < 0.01$  (\*\*) and  
595  $p < 0.001$  (\*\*\*) by one-way ANOVA.

596

597 **Fig 9. Effect of EC on DAF-16::GFP nuclear localization.** Transgenic worms expressing  
598 the fusion protein DAF-16::GFP were cultivated in the absence (controls) and presence  
599 of EC (200 µM) and evaluated at 2<sup>nd</sup> day of adulthood. DAF-16::GFP subcellular  
600 distribution was classified as cytosolic, intermediate and nuclear.

601

602 As previously discussed, EC treatment did not increase oxidative stress resistance in  
603 *daf-16(mu86)* mutant nematodes, but it produced an increase in *daf-16* mRNA  
604 expression in wild type worms, suggesting that EC protected against thermal stress in a

605 DAF-16-dependent manner. Besides EC treatment did not increase SOD-3::GFP  
606 expression, which is coherent with the results obtained in a previous study of our group  
607 [22], where no increase in the activity of SOD was found after treatment of the worms  
608 with EC. Bonomo et al. [44] obtained similar results in worms treated with a  
609 polyphenols-rich extract of Açai, with no observation of an increase in oxidative  
610 resistance in *daf-16(mu86)* mutant worms, as well as no increase in DAF-16 nuclear  
611 localization and *sod-3* expression under normal conditions. According to those authors  
612 [44], this might be explained as the polyphenols extract would lead DAF-16 protein to  
613 increase its transcriptional activity but not its concentration, thus DAF-16 activation in  
614 the nucleus leading to the upregulation of specific genes other than *sod-3*. In fact, they  
615 also observed that the extract increased the expression of genes *ctl-1* and *gst-7* in a DAF-  
616 16 dependent manner. In the same way, our results suggested that the treatment with  
617 EC produced a more important effect in other DAF-16 target genes, like *hsp-16.2* and  
618 *hsp-70* that encode heat shock proteins.

619 The GFP expression in some reporter strains studied (*Phsp-16.2::gfp*, *Psod-3::gfp* and  
620 *Pdaf-16::daf-16::gfp*) was also investigated in older worms (9<sup>th</sup> day of adulthood) in  
621 order to know if the mode of action of EC changed depending on the age of the worm.  
622 Similar results were obtained as in younger worms, with no differences in DAF-16  
623 nuclear translocation (Fig. S2) and in the expression of SOD-3 between control and EC-  
624 treated worms being observed (Fig. S3). However, the increase expression of HSP-16.2  
625 after thermal stress compared to controls was more accentuated in older worms (Fig.  
626 S3s). This observation is relevant, because heat shock proteins levels decrease in aged  
627 worms leading to an increase of unfolded proteins, so that worms become more  
628 sensitive to stress, finally increasing mortality [43].

629 Our results identify a significant increase of *gst-4* expression, the loss of resistance to  
630 thermal stress in *skn-1(zu67)* mutants and increased *skn-1* expression in worms treated  
631 with EC, suggesting that EC could be modulating the Nrf2/SKN-1 pathway. The  
632 transcription factor SKN-1 is the ortholog of the mammalian Nrf protein, which induces  
633 the expression of phase-II detoxifying enzymes and antioxidant proteins, such as SOD,  
634 GST, glutathione peroxidase (GPO) or NAD(P)H:quinone oxidoreductase (NQO-1) [2, 16].  
635 This control is mediated through an antioxidant response elements (ARE) in the  
636 promoter region of genes encoding phase II enzymes and antioxidant components.  
637 Several additional ARE-containing genes were predicted to be direct SKN-1 targets, such  
638 as GST-4 (glutathione transferase-4), which acts conjugating the reduced form of  
639 glutathione (GSH) to a variety of toxic substrates including damaged lipids and proteins,  
640 thereby decreasing their activity and making them more water soluble favouring their  
641 removal [50, 51]. The increased SKN-1 activity could explain the decrease of peroxidated  
642 lipids and carbonylated proteins in worms treated with EC with respect to untreated  
643 animals. In a previous study, our group also showed that the treatment with EC  
644 produced a significant increase in the levels of GSH in *C. elegans* with respect to non  
645 treated worms [22]. Similar observations were made in assays carried out on astrocytes  
646 [52] and HepG2 cells [53], where the treatment with EC activated Nrf2 and increased  
647 GSH levels. Furthermore, it is also known that the Nrf-2-ARE pathway is activated by  
648 reactive oxygen species [54]. Thus, the moderate increase in ROS levels observed in  
649 worms treated with EC (Fig 3) could lead to the activation of this pathway, ultimately  
650 inducing endogenous antioxidant protection and conferring a great protection against  
651 oxidative damage.

652 Tullet et al. [16, 55] proposed that the effects of SKN-1 on resistance to oxidative  
653 stress and longevity can be dissociated with SKN-1 being required for resistance to  
654 oxidative stress but not for the increased lifespan resulting from overexpression of DAF-  
655 16. On the other hand, DAF-16 overexpression rescues the short lifespan of *skn-1*  
656 mutants but not their hypersensitivity to oxidative stress. This dual function could  
657 explain the effects of EC in *C. elegans* observed herein, where EC-treated worms showed  
658 improved resistance to thermal stress but not increased mean lifespan.

659 High levels of HSP promote longevity and are also a predictor of the ability to  
660 withstand thermal stress [23, 56]. Hsu et al. suggested that HSF-1 and DAF-16 together  
661 activate the expression of specific genes, including genes encoding HSP, which in turn  
662 promote longevity [17]. HSP act as molecular chaperones and proteases by preventing  
663 the accumulation of aggregated proteins in response to heat and other forms of stress.  
664 This activity may prevent oxidized or otherwise damaged proteins from aggregating  
665 before they can be refolded or degraded [17]. The results obtained in the present  
666 study showed that EC upregulated HSP-16.2 and HSP-70 in *C. elegans*, which might  
667 explain why EC significantly increased the survival of *C. elegans* under heat stress and  
668 maximum lifespan. Other authors have also related the improvement in lifespan and  
669 increase of thermal stress resistance in *C. elegans* induced by different polyphenols with  
670 the capacity to upregulate *hsp* and other genes associated to stress resistance [19, 23,  
671 57].

## 672 **Conclusions**

673 Our results suggest a protection of EC against oxidative damage, as evaluated from  
674 worm survival and the levels of lipid peroxidation products and protein carbonylation as

675 biomarkers. EC treatment induces a moderate elevation in ROS levels, which might lead  
676 to a compensatory response, increasing endogenous mechanisms of protection that  
677 would result in prolonged maximum lifespan and greater resistance to oxidative stress.  
678 In addition, stress resistance tests revealed that the heat-resistant phenotype against  
679 thermal stress was absent in *daf-2*, *age-1*, *akt-1*, *akt-2*, *sgk-1*, *daf-16*, *skn-1* and *hsf-1*  
680 mutants. Thus, these protective effects could be mediated through regulation of the  
681 insulin/IGF-1 signalling pathway, where DAF-16 acts a central regulator and together  
682 with HSF-1 and SKN-1 transcription factors control a wide variety of downstream genes  
683 with diverse functions that act in stress response and lifespan modulation. In particular,  
684 it has been shown that EC could upregulate the expression of GST-4, HSP-16.2 and HSP-  
685 70. Overall, the observations of this study indicated that the effects of EC in stress  
686 resistance are achieved by the regulation of the expression of different genes of the IIS  
687 pathway independently of the worm age.

688

## 689 **Acknowledgments**

690 This work was funded by MINECO (Spanish National Project AGL2015-64522-C2)  
691 (BFU2015-64408-P) and FEDER-Interreg España-Portugal Programme (Project ref.  
692 0377\_IBERPHENOL\_6\_E). B.A-D is recipient of PhD fellowships from the Junta de Castilla  
693 y Leon (Orden EDU/310/2015). The authors are thankful to Marta Rodríguez-Romero  
694 and José Antonio Mora-Lorca for providing the necessary help with the assays of RT-  
695 qPCR and fluorescence microscopy, respectively.

696

## 697 **Author Contributions**

- 698 **Conceptualization:** Ana M. González-Paramás, Celestino Santos-Buelga
- 699 **Formal analysis:** Begoña Ayuda-Durán, Susana González-Manzano, Montserrat Dueñas
- 700 **Funding acquisition:** Ana M. González-Paramás, Celestino Santos-Buelga
- 701 **Methodology:** Begoña Ayuda-Durán, Susana González-Manzano, Antonio Miranda-
- 702 Vizquete
- 703 **Project administration:** Ana M. González-Paramás, Celestino Santos-Buelga
- 704 **Resources:** Ana M. González-Paramás, Celestino Santos-Buelga, Antonio Miranda-
- 705 Vizquete
- 706 **Supervision:** Ana M. González-Paramás, Celestino Santos-Buelga, Antonio Miranda-
- 707 Vizquete
- 708 **Writing – original draft:** Begoña Ayuda-Durán, Celestino Santos-Buelga
- 709 **Writing – review & editing:** Begoña Ayuda-Durán, Celestino Santos-Buelga, Ana M.
- 710 González-Paramás, Antonio Miranda-Vizquete, Susana González-Manzano

711

## 712 **References**

- 713 1. Santos-Buelga C, Scalbert A. Proanthocyanidins and tannin-like compounds –
- 714 nature, occurrence, dietary intake and effects on nutrition and health. *J. Sci.*
- 715 *Food Agric.* 2000;80: 1094-1117.
- 716 2. Koch K, Havermann S, Büchter C, Wätjen W. *Caenorhabditis elegans* as Model
- 717 System in Pharmacology and Toxicology: Effects of Flavonoids on Redox-
- 718 Sensitive Signalling Pathways and Ageing. *Sci. World J.* 2014; 920398. doi:
- 719 10.1155/2014/920398.



- 720 3. Kenyon C. The Plasticity of Aging: Insights from Long-Lived Mutants. *Cell*.  
721 2005;120: 449–460.
- 722 4. Kenyon CJ. The genetics of ageing. *Nature*. 2010;464: 504-12.
- 723 5. Lapointe J, Hekimi S. When a theory of aging badly. *Cell. Mol. Life Sci*. 2010;67:  
724 1-8.
- 725 6. Ames BN, Shigenaga MK, Hagen TM. Oxidants, antioxidants, and the  
726 degenerative diseases of aging. *Proc Natl Acad Sci*. 1993;90: 7915–7922.
- 727 7. Sohal RS, Orr WC. The redox stress hypothesis of aging. *Free Radic Biol Med*.  
728 2012;52: 539-555.
- 729 8. Guarente L, Kenyon C. Genetic pathways that regulate ageing in model  
730 organisms. *Nature*. 2000; 408: 255-262.
- 731 9. Tissenbaum HA. Using *C. elegans* for aging research. *Invertebr Reprod Dev*. 2015;  
732 59-63
- 733 10. Silverman GA, Luke CJ, Bhatia SR, Long, OS, Vetica AC, Perlmutter DH, Pak SC.  
734 Modeling molecular and cellular aspects of human disease using the nematode  
735 *Caenorhabditis elegans*. *Pediatr Res*. 2009;65: 10-8.
- 736 11. Schuster E, McElwee JJ, Tullet JM, Doonan R, Matthijssens F, Reece-Hoyes JS,  
737 Hope IA, Vanfleteren JR, Thornton JM, Gems D. DamID in *C. elegans* reveals  
738 longevity-associated targets of DAF-16/FoxO. *Mol Syst Biol*. 2010;10: 6-399.
- 739 12. Lin K, Dorman JB, Rodan A, Kenyon C. daf-16: An HNF-3/forkhead family member  
740 that can function to double the life-span of *Caenorhabditis elegans*. *Science*.  
741 1997; 278: 1319-1322.

- 742 13. Ogg S, Paradis S, Gottlieb S, Patterson GI, Lee L, Tissenbaum HA, Ruvkun G. The  
743 Fork head transcription factor DAF-16 transduces insulin-like metabolic and  
744 longevity signals in *C. elegans*. *Nature*. 1997;389: 994-999.
- 745 14. Altintas O, Park S, Lee SJV. The role of insulin/IGF-1 signaling in the longevity of  
746 model in vertebrates, *C. elegans* and *D. melanogaster*. *BMB Rep*. 2016;49: 81–  
747 92.
- 748 15. Antebi A. Genetics of Aging in *Caenorhabditis elegans*. *Plos Genetics*. 2007;  
749 3(9):e129.
- 750 16. Tullet JM, Hertweck M, An JH, Baker J, Hwang JY, Liu S, Oliveira RP, Baumeister  
751 R, Blackwell TK. Direct inhibition of the longevity-promoting factor SKN-1 by  
752 insulin-like signaling in *C. elegans*. *Cell*. 2008;132: 1025-38.
- 753 17. Hsu A, Coleen T, Kenyon C. Regulation of Aging and Age-Related Disease by DAF-  
754 16 and Heat-Shock Factor. *Science*. 2003;300: 1142-1145.
- 755 18. Murphy CT, McCarroll SA, Bargmann C, Fraser A, Kamath RS, Ahringer J, Li H,  
756 Kenyon C. Genes that act downstream of DAF-16 to influence the lifespan of  
757 *Caenorhabditis elegans*. *Nature*. 2003;424: 277-83.
- 758 19. Asthana J, Mishra BN, Pandey R. Acacetin promotes healthy aging by altering  
759 stress response in *Caenorhabditis elegans*. *Free Radic Res*. 2016;50: 861-74.
- 760 20. Pietsch K, Saul N, Menzel R, Stürzenbaum SR, Steinberg CE. Quercetin mediated  
761 lifespan extension in *Caenorhabditis elegans* is modulated by age-1, daf-2, sek-1  
762 and unc-43. *Biogerontology*. 2009;10: 565-578.
- 763 21. Surco-Laos F, Cabello J, Gómez-Orte E, González-Manzano S, González-Paramás  
764 AM, Santos-Buelga C. Effects of O-methylated metabolites of quercetin on

- 765 oxidative stress, thermotolerance, lifespan and bioavailability on *Caenorhabditis*  
766 *elegans*. Food Funct. 2011;2: 445-456.
- 767 22. González-Manzano S, González-Paramás AM, Delgado L, Patianna S, Surco-Laos  
768 F, Dueñas M, Santos-Buelga C. Oxidative status of stressed *Caenorhabditis*  
769 *elegans* treated with epicatechin. J Agric Food Chem. 2012;60: 8911-8916.
- 770 23. Zhang L, Jie G, Zhang J, Zhao B. Significant longevity-extending effects of EGCG  
771 on *Caenorhabditis elegans* under stress. Free Radic. Biol. Med. 2009;46: 414-421.
- 772 24. Büchter C, Ackermann D, Havermann S, Honnen S, Chovolou Y, Fritz G,  
773 Kampkötter A, Wätjen W. Myricetin-mediated lifespan extension in  
774 *Caenorhabditis elegans* is modulated by DAF-16. Int J Mol Sci. 2013;14: 11895-  
775 914.
- 776 25. Wang H, Joseph JA. Quantifying cellular oxidative stress by dichlorofluorescein  
777 assay using microplate reader. Free Radic. Biol. Med. 1999;27: 612-616.
- 778 26. Bradford MM. A rapid and sensitive for the quantitation of microgram  
779 quantities of protein utilizing the principle of protein-dye binding. Anal.  
780 Biochem. 1976;72: 248-254.
- 781 27. Andreoli A, Manini P, Corradi M, Mutti A, Niessen WM. Determination of  
782 patterns of biologically relevant aldehydes in exhaled breath condensate of  
783 healthy subjects by liquid chromatography/atmospheric chemical ionization  
784 tandem mass spectrometry. Rapid Commun. Mass Spectrom. 2003;17: 637-645.
- 785 28. Chaudhuri AR, De Waal EM, Pierce A, Remmen HV, Ward WF, Richardson A.  
786 Detection of protein carbonyls in aging liver tissue: A fluorescence-based  
787 proteomic approach. Mech Ageing Dev. 2006;127: 849-861.

- 788 29. Livak KJ, Schmittgen TD. Analysis of relative gene expression data using Real-  
789 Time Quantitative PCR and the  $2^{-\Delta\Delta CT}$  method. *Methods*. 2001;25: 402-408.
- 790 30. Surco-Laos F, Dueñas M, González-Manzano S, Cabello J, Santos-Buelga C,  
791 González-Paramás AM. Influence of catechins and their methylated metabolites  
792 on lifespan and resistance to oxidative and thermal stress of *Caenorhabditis*  
793 *elegans* and epicatechin uptake. *Food Res Int*. 2012;46: 514-521.
- 794 31. Harman D. The biologic clock: the mitochondria? *J Am Geriatr Soc*. 1972; 20: 145-  
795 147.
- 796 32. Gladyshev VN. The free Radical theory of aging is dead. Long live the damage  
797 theory! *Antioxid. Redox Signal*. 2014;20: 727-731.
- 798 33. Sanz A. Mitochondrial reactive oxygen species: Do they extend or shorten animal  
799 lifespan? *Biochim Biophys Acta*. 2016;1857: 1116-1126.
- 800 34. Lee SJ, Hwang AB, Kenyon C. Inhibition of respiration extends *C. elegans* life span  
801 via reactive oxygen species that increase HIF-1 activity. *Curr. Biol*. 2010;20: 2131-  
802 2136.
- 803 35. Heidler T, Hartwig K, Daniel H, Wenzel U. *Caenorhabditis elegans* lifespan  
804 extension caused by treatment with an orally active ROS-generator is dependent  
805 on DAF-16 and SIR-2.1. *Biogerontology*. 2010;11: 183-195.
- 806 36. Van Raamsdonk JM, Hekimi S. Superoxide dismutase is dispensable for normal  
807 animal lifespan. *Proc Natl Acad Sci U S A*. 2012;109: 5785-90.
- 808 37. Meng J, Lv Z, Qiao X, Li X, Li Y, Zhang Y, Chen C. The decay of Redox-stress  
809 Response Capacity is a substantive characteristic of aging: Revising the redox  
810 theory of aging. *Redox Biol*. 2017;11: 365-374.

- 811 38. Xiong LG, Chen YJ, Tong JW, Gong YS, Huang JA, Liu ZH. Epigallocatechin-3-gallate  
812 promotes healthy lifespan through mitohormesis during early-to-mid adulthood  
813 in *Caenorhabditis elegans*. Redox Biol. 2017;14: 305-315.
- 814 39. Ristow M, Schmeisser, K. Mitohormesis: Promoting Health and Lifespan by 593  
815 Increased Levels of Reactive Oxygen Species (ROS). Dose-Response. 2014;12:  
816 288-341.
- 817 40. Lapointe J, Stepanyan Z, Bigras E, Hekimi S. Reversal of the mitochondrial  
818 phenotype and slow development of oxidative biomarkers of aging in long-lived  
819 Mcl1<sup>+/-</sup> Mice. J Biol Chem. 2009;284: 20364-20374.
- 820 41. Mansuri ML, Parihar P, Solanki I, Parihar MS. Flavonoids in modulation of cell  
821 survival signalling pathways. Genes Nutr. 2014;9(3):400.
- 822 42. Martorell P, Forment JV, de Llanos R, Montón F, Llopis S, González N, Genovés S,  
823 Cienfuegos E, Monzó H, Ramón D. Use of *Saccharomyces cerevisiae* and  
824 *Caenorhabditis elegans* as model organisms to study the effect of cocoa  
825 polyphenols in the resistance to oxidative stress. J Agric Food Chem. 2011;  
826 59:2077-85.
- 827 43. Abbas S, Wink M. Epigallocatechin gallate inhibits beta amyloid oligomerization  
828 in *Caenorhabditis elegans* and affects the daf-2/insulin-like signalling pathway.  
829 Phytomedicine. 2010; 17: 902-909.
- 830 44. Bonomo LdeF, Silva DN, Boasquivis PF, Paiva FA, Guerra JF, Martins TA, de Jesus-  
831 Torres AG, de Paula IT, Caneschi WL, Jacolot P, Grossin N, Tessier FJ, Silva ME,  
832 Pedrosa ML, Oliveira Rde P. Açai (*Euterpe oleracea* Mart.) modulates oxidative  
833 stress resistance in *Caenorhabditis elegans* by direct and indirect mechanisms.  
834 PLoS One. 2014; 3;9(3):e89933.

- 835 45. Saul N, Pietsch K, Menzel R, Stürzenbaum SR, Steinberg CE. Catechin induced  
836 longevity in *C. elegans*: from Key regulator genes to disposable soma. Mech  
837 Ageing Dev. 2009;130: 447-486.
- 838 46. Cai WJ, Huang JH, Zhang SQ, Wu B, Kapahi P, Zhang XM, Shen ZY. Icarin and its  
839 derivative icariside II extend healthspan via insulin/IGF-1 pathway in *C. elegans*.  
840 PLoS One. 2011;6(12):e28835.
- 841 47. Zheng SQ, Huang XB, Xing TK, Ding AJ, Wu GS, Luo HR. Chlorogenic Acid Extends  
842 the Lifespan of *Caenorhabditis elegans* via Insulin/IGF-1 Signaling Pathway. J  
843 Gerontol A Biol Sci Med Sci. 2017;72: 464-472.
- 844 48. Saul N, Pietsch K, Menzel R, Steinberg CE. Quercetin- mediated longevity in *C.*  
845 *elegans*: Is DAF-16 involved? Mech Ageing Dev. 2008;129: 611-613.
- 846 49. Furuyama T, Nakazawa T, Nakano I, Mori N. Identification of the differential  
847 distribution patterns of mRNAs and consensus binding sequences for mouse  
848 DAF-16 homologues. Biochem J. 2000;349: 629-34.
- 849 50. Kahn NW, Rea SL, Moyle S, Kell A, Johnson TE. Proteasomal dysfunction activates  
850 the transcription factor SKN-1 and produces a selective oxidative-stress response  
851 in *Caenorhabditis elegans*. Biochem J. 2008;409: 205-13.
- 852 51. Van Raamsdonk JM, Hekimi S. Reactive Oxygen Species and Aging in  
853 *Caenorhabditis elegans*: Causal or Causal Relationship? Antioxidants & Redox.  
854 2010;13: 1911–1953.
- 855 52. Bahia PK, Rattray M, Williams R. J. Dietary flavonoid (–)epicatechin stimulates  
856 phosphatidylinositol 3-kinase-dependent anti-oxidant response element activity  
857 and up-regulates glutathione in cortical astrocytes. J. Neurochem. 2008; 106:  
858 2194–2204.

- 859 53. Granado-Serrano AB, Martin MA, Haegeman G, Goya L, Bravo L, Ramos S.  
860 Epicatechin induces NF- $\kappa$ B, activator protein-1 (AP-1) and nuclear transcription  
861 factor erythroid 2p45-related factor-2 (Nrf2) via phosphatidylinositol-3-  
862 kinase/protein kinase B (PI3K/ AKT) and extracellular regulated kinase (ERK)  
863 signalling in HepG2 cells. *Br. J. Nutr.* 2010;103: 168–79.
- 864 54. Miranda-Vizueté A, Veal EA. *Caenorhabditis elegans* as a model for  
865 understanding ROS function in physiology and disease. *Redox Biol.* 2017; 11:708-  
866 714.
- 867 55. Tullet, JMA, Green JW, Au C, Benedetto A, Thompson MA, Clark E, Gilliat AF,  
868 Young A, Schmeisser K, Gems D. The SKN-1/Nrf2 transcription factor can protect  
869 against oxidative stress and increase lifespan in *C. elegans* by distinct  
870 mechanisms. *Aging Cell.* 2017;16: 1191-1194.
- 871 56. Rea SL, Wu D, Cypser JR, Vaupel JW, Thomas EJ. A Stress-Sensitive Reporter  
872 Predicts Longevity in Isogenic Populations of *Caenorhabditis elegans*. *Nat. Genet.*  
873 2005;37: 894-898.
- 874 57. Upadhyay A; Chompoo J, Taira N, Fukuta M, Tawata S. Significant longevity-  
875 extending effects of *Alpinia zerumbet* leaf extract on the life span of  
876 *Caenorhabditis elegans*. *Biosci Biotechnol Biochem.* 2013;77: 217-223.

877

## 878 **Supporting information**

879 **S1 Fig. Effect of EC on the expression of HSP-16.2 and HSP-70 in *C. elegans*.** Age- synchronized  
880 L1 transgenic worms expressing *Phsp-16.2::gfp* and *Phsp-70::gfp* transgenes were cultivated in  
881 the absence (controls) and presence of EC (200  $\mu$ M) in the culture media. Relative GFP  
882 fluorescence intensities in transgenic **A)** *Phsp-16.2::gfp* and **B)** *Phsp-70::gfp* worms were

883 quantified under normal growth conditions and after subjecting worms to thermal stress to 35  
884 °C for 1h. Total GFP fluorescence of each whole worm was quantified using Image J software.  
885 Three independent experiments were performed. The results are presented as the mean values  
886  $\pm$  SEM. Approximately 35 randomly selected worms from each set of experiments were  
887 examined. Differences compared with the control (0  $\mu$ M, 0.1% DMSO) were considered  
888 statistically significant at  $p < 0.05$  (\*) and  $p < 0.01$  (\*\*) and  $p < 0.001$  (\*\*\*) by one-way ANOVA.

889 **S2 Fig. Effect of EC on DAF-16::GFP nuclear localization.** Transgenic worms expressing the DAF-  
890 16::GFP fusion protein were cultivated in the absence (controls) and presence of EC (200  $\mu$ M)  
891 and evaluated at 9<sup>th</sup> day of adulthood. DAF-16::GFP subcellular localization was classified as  
892 cytosolic, intermediate and nuclear.

893 **S3 Fig. Effect of EC on the expression of SOD-3 and HSP-16.2 in old worms (day 9<sup>th</sup> of adult).**  
894 Age-synchronized L1 transgenic worms of *Psod-3:gfp* and *Phsp-16.2:gfp* were cultivated in the  
895 absence (controls) and presence of EC (200  $\mu$ M) in the culture media. Total GFP fluorescence of  
896 each whole worm was quantified using Image J software. Three independent experiments were  
897 performed. The results are presented as the mean values  $\pm$  SEM. Approximately 35 randomly  
898 selected worms from each set of experiments were examined. Differences compared with the  
899 control (0  $\mu$ M, 0.1% DMSO) were considered statistically significant at  $p < 0.05$  (\*) and  $p < 0.01$   
900 (\*\*\*) and  $p < 0.001$  (\*\*\*) by one-way ANOVA.



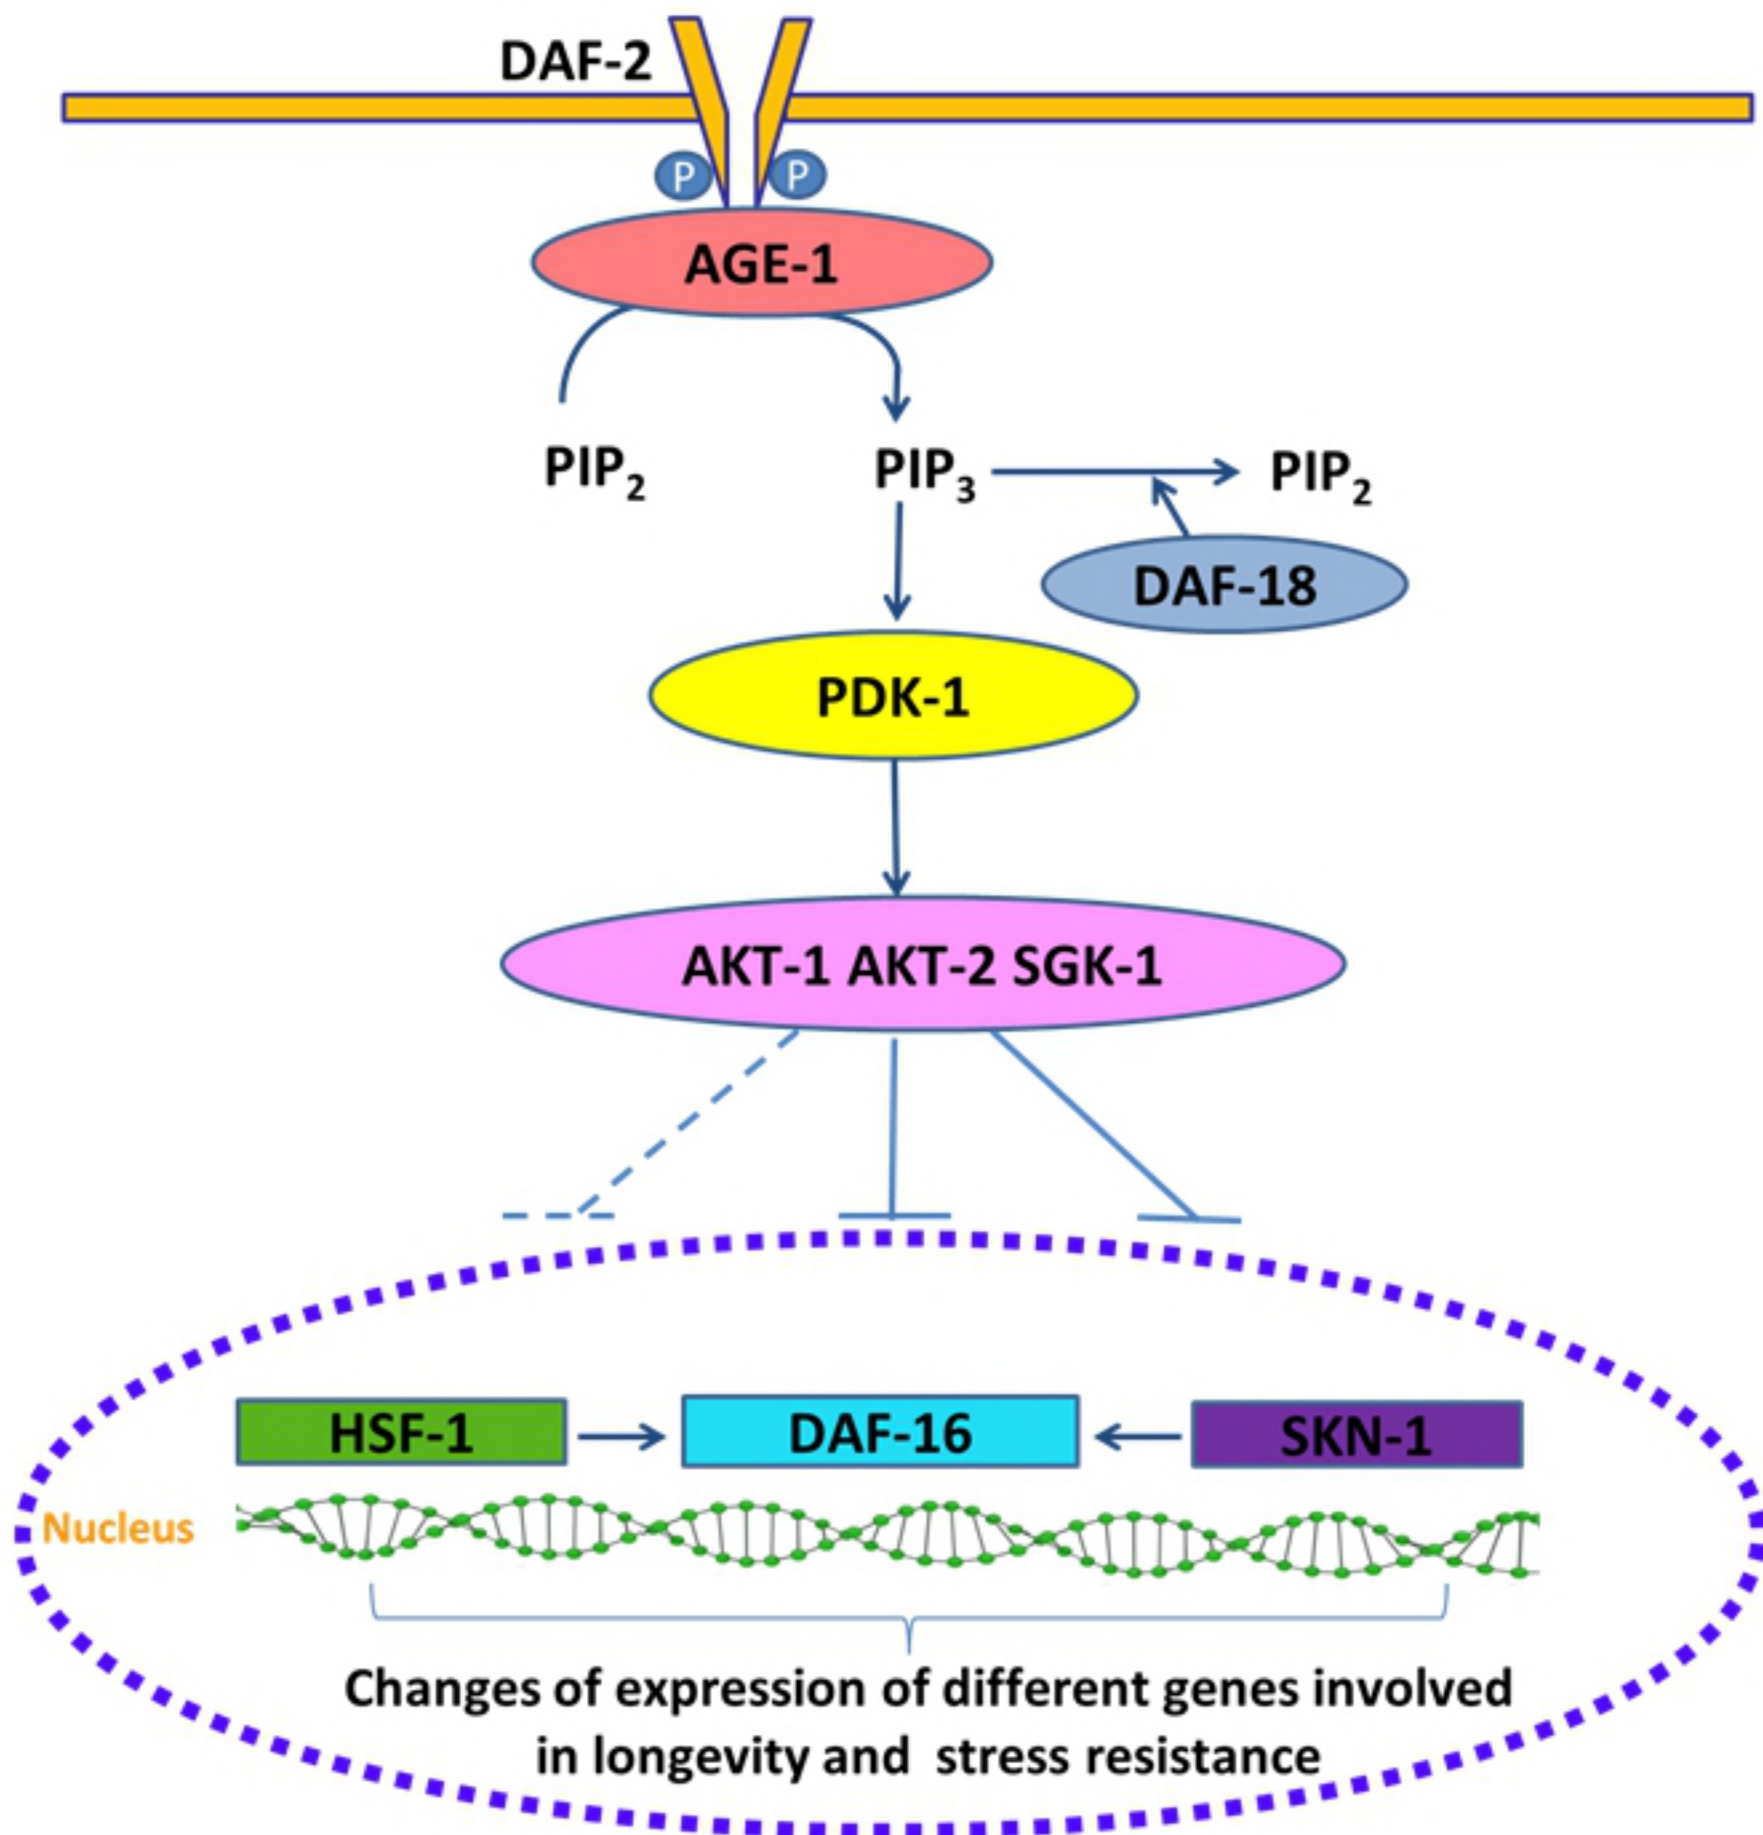

### A) 10<sup>th</sup> of adulthood

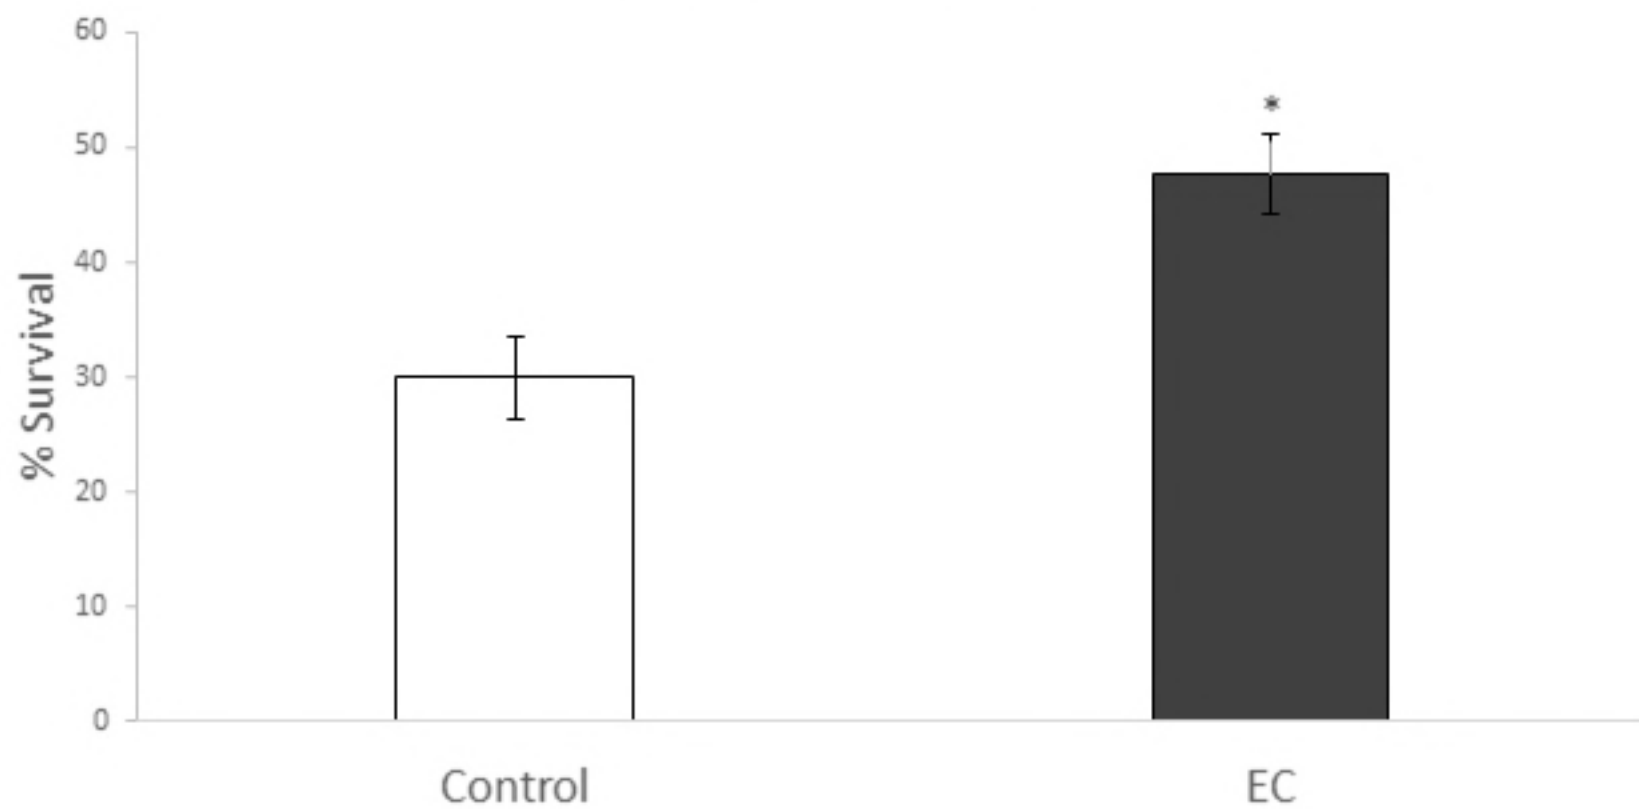

### B) 17<sup>th</sup> of adulthood

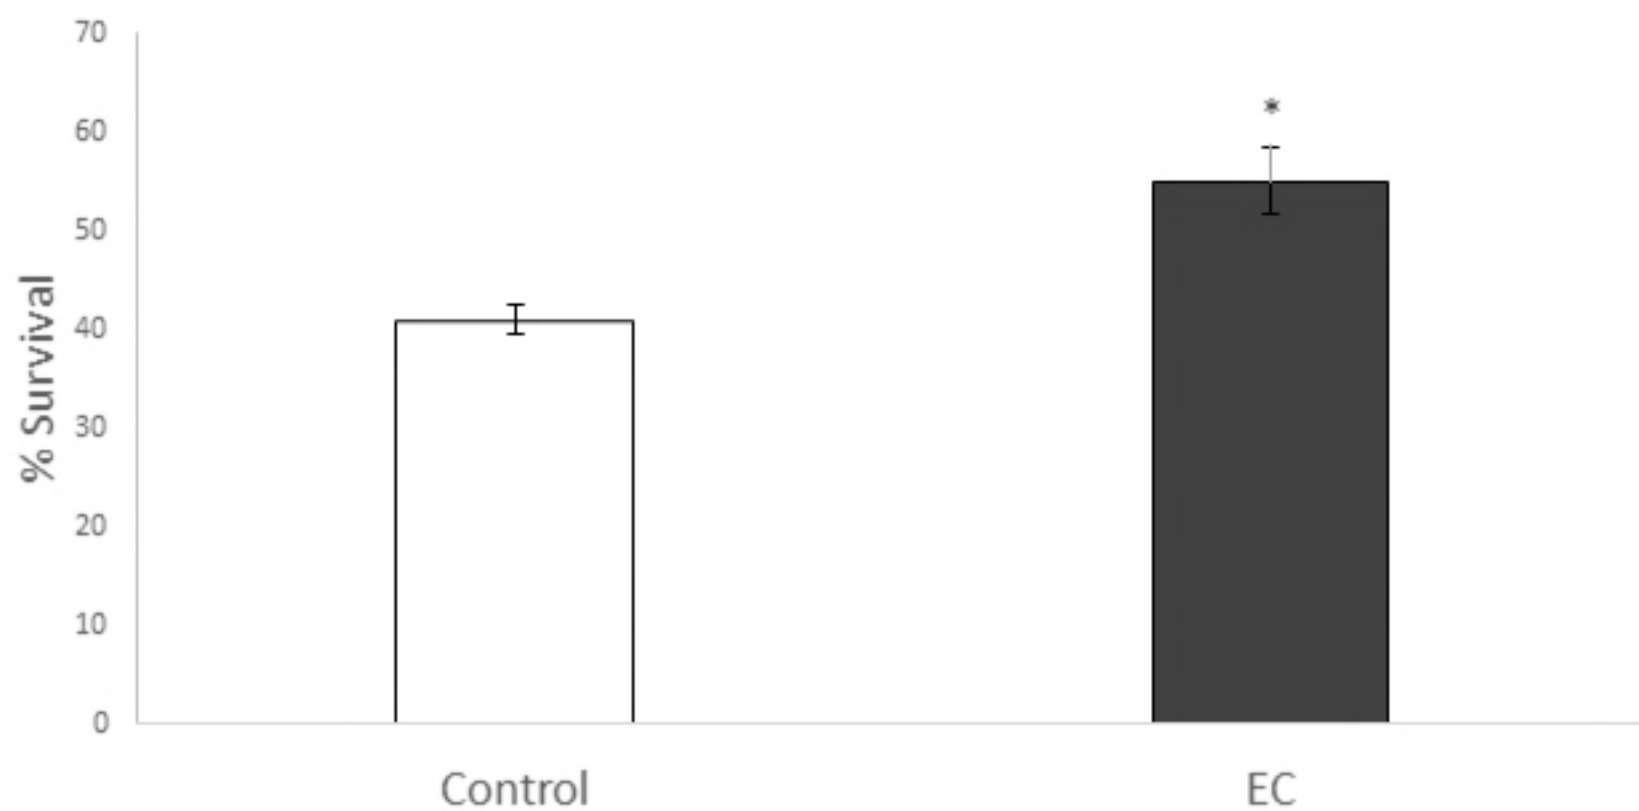

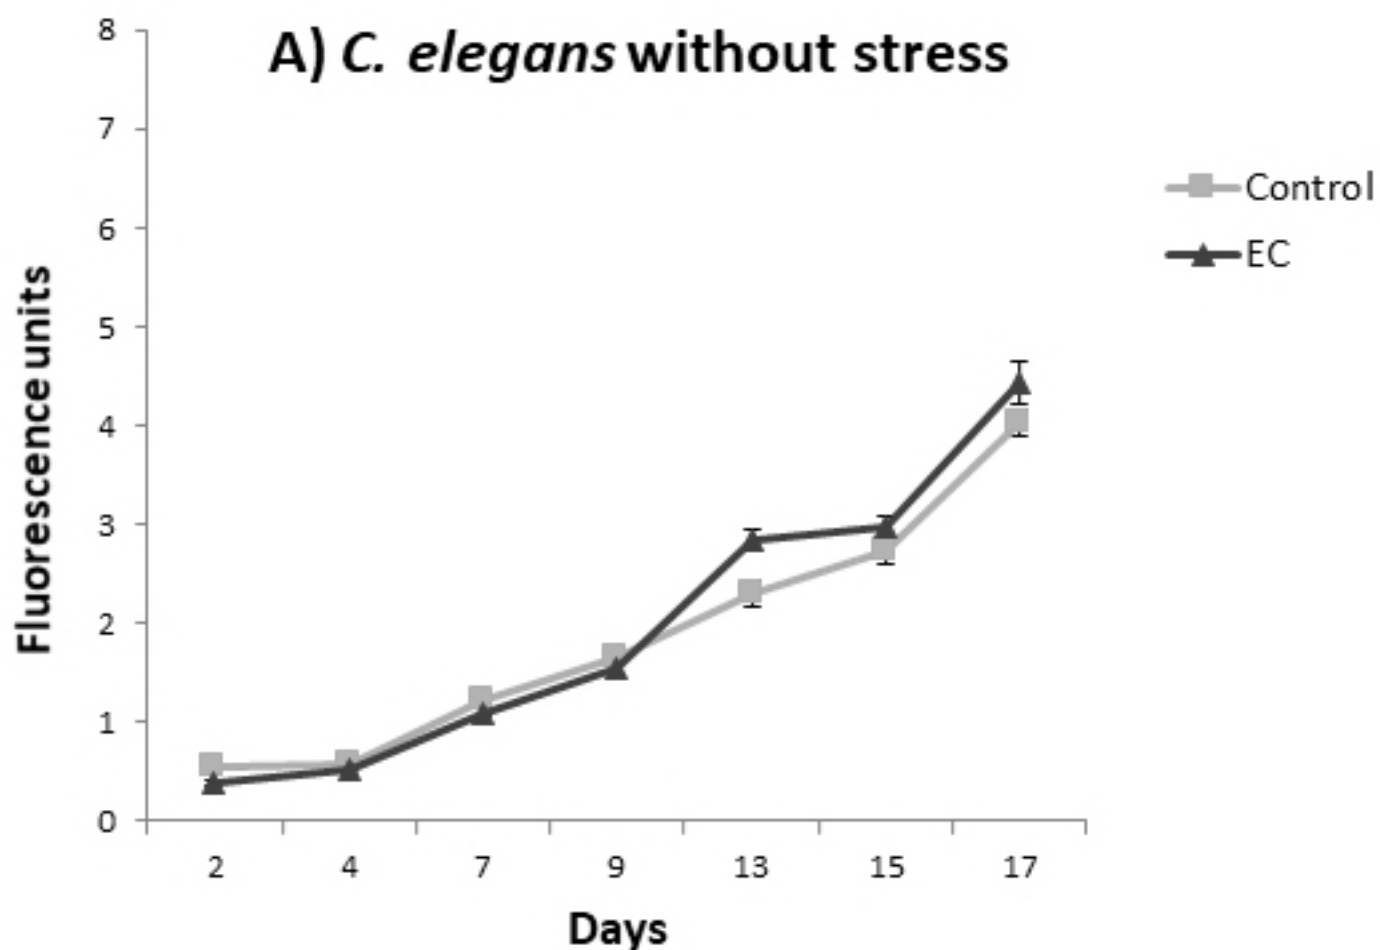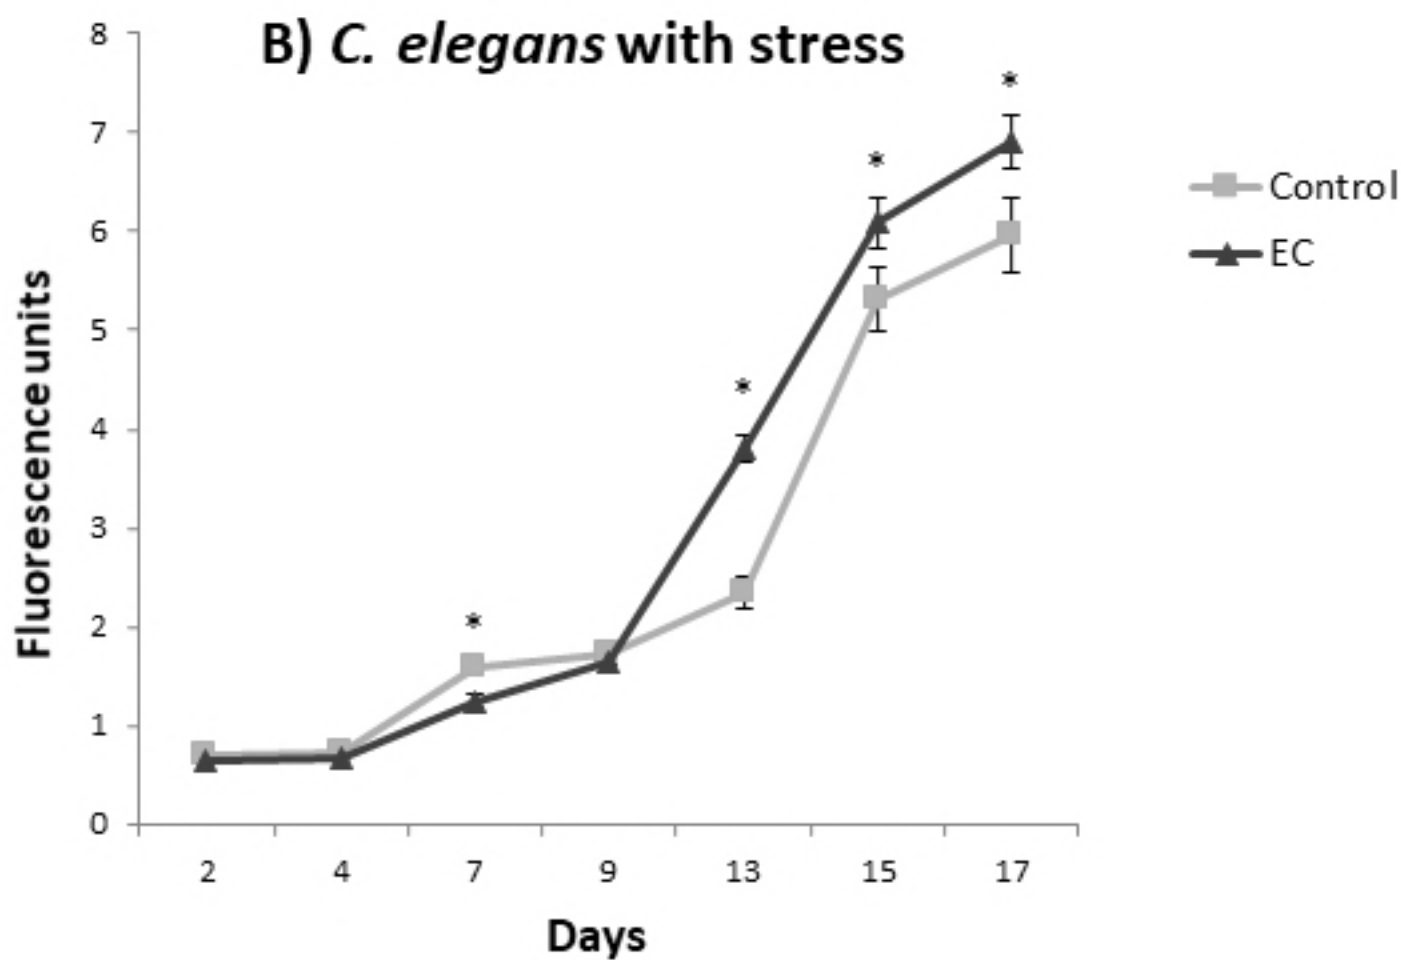

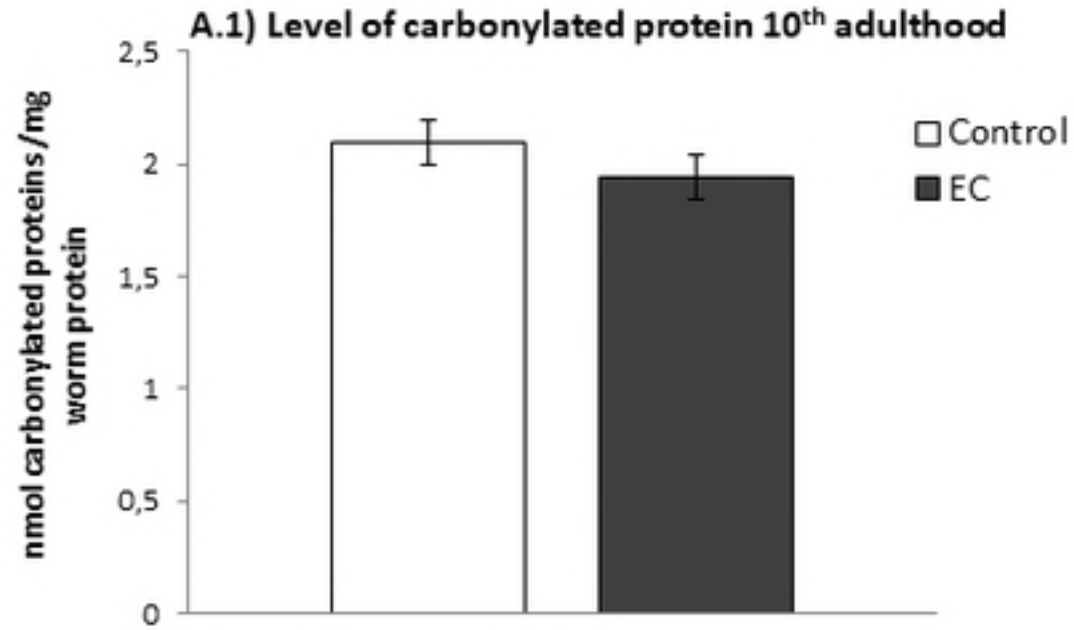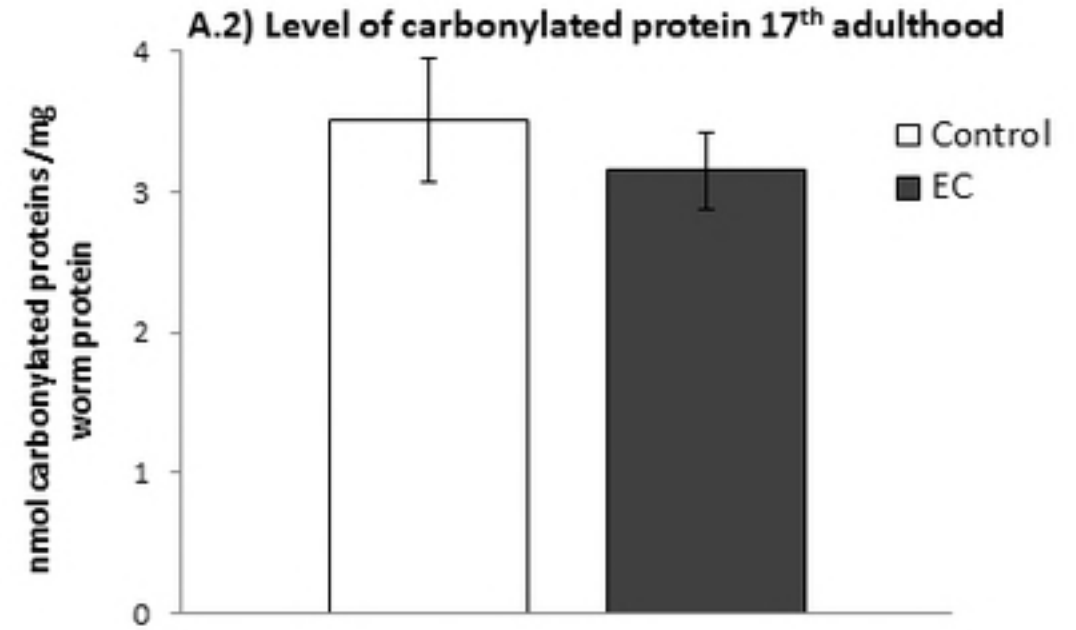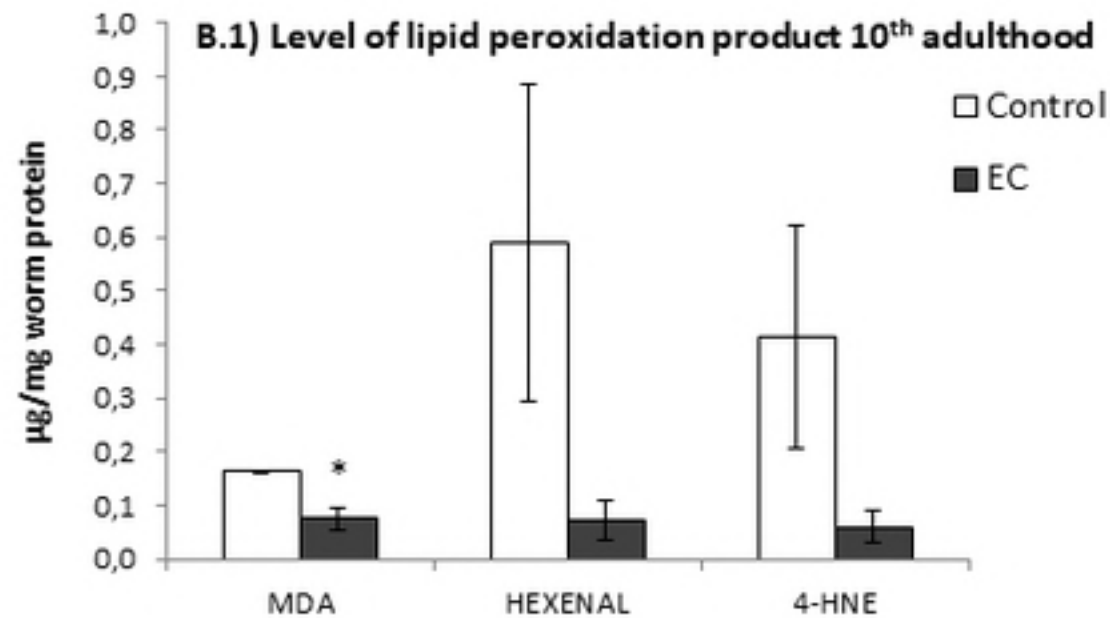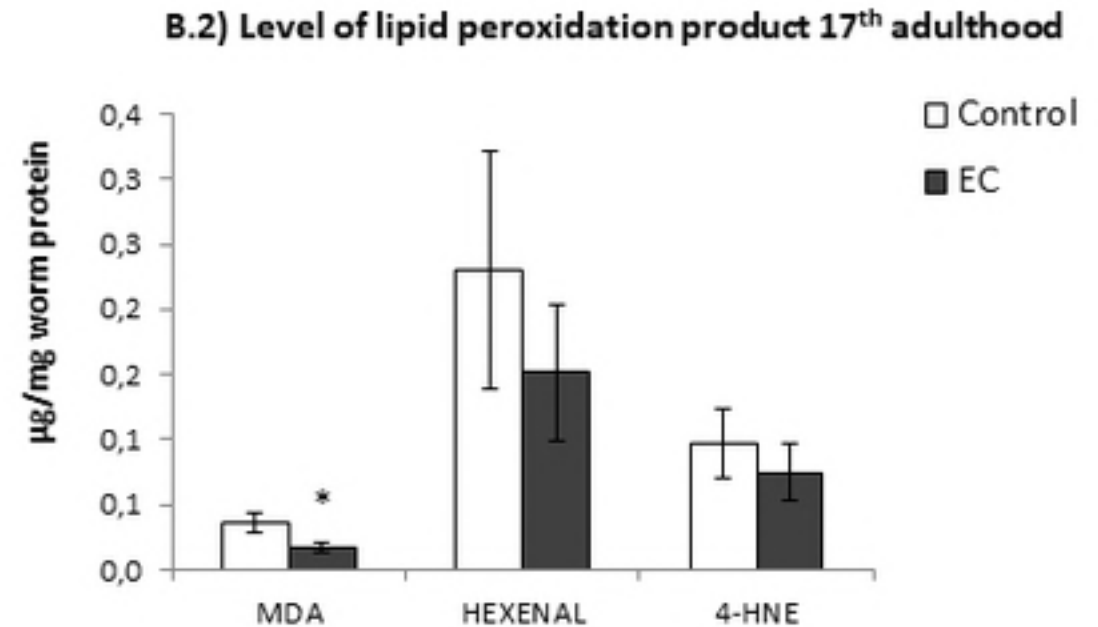

2<sup>th</sup> day of adult

9<sup>th</sup> day of adult

A.1

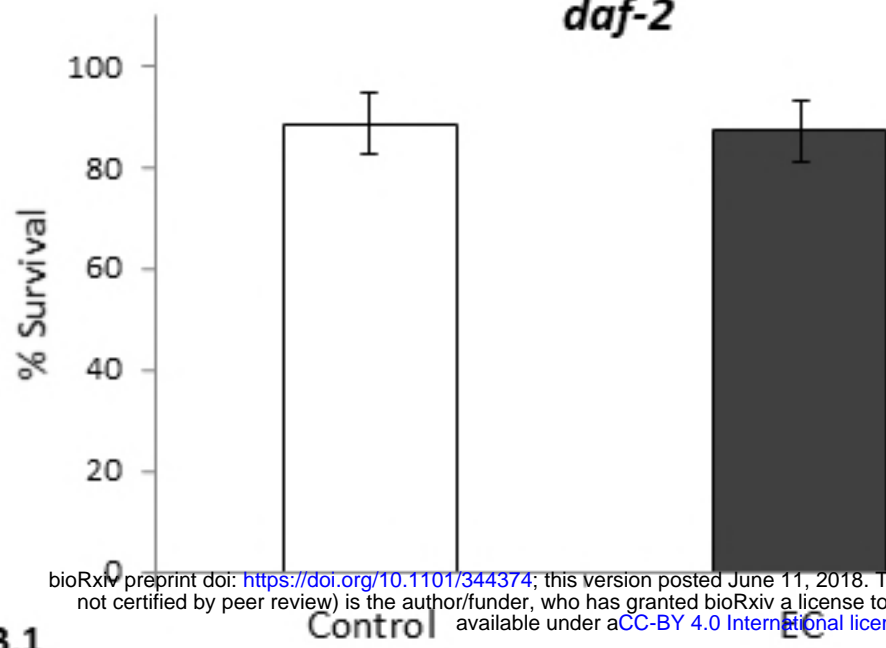

A.2

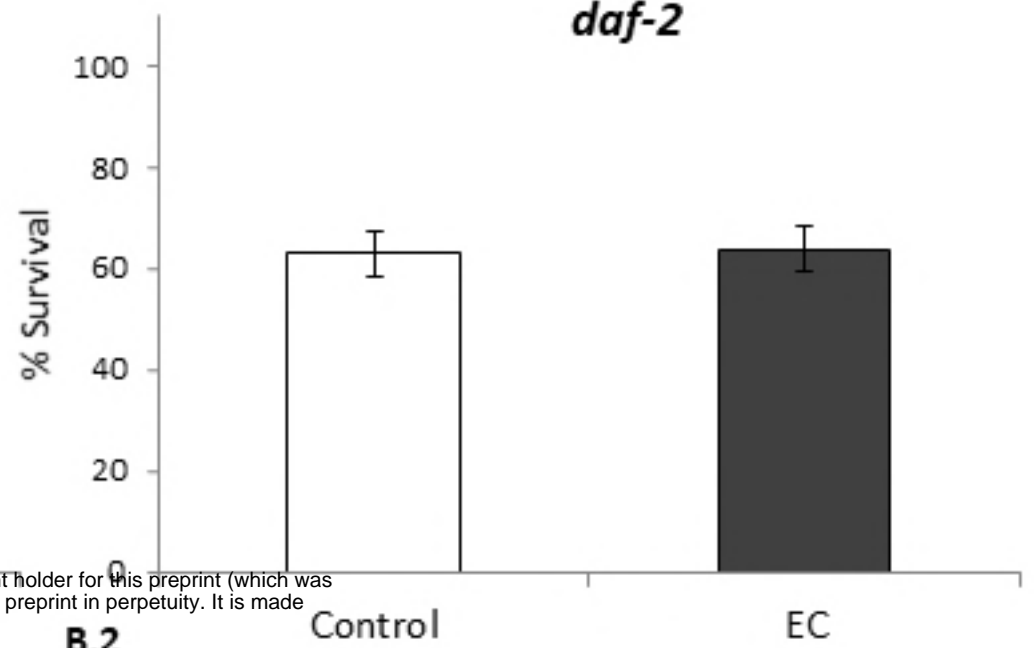

bioRxiv preprint doi: <https://doi.org/10.1101/344374>; this version posted June 11, 2018. The copyright holder for this preprint (which was not certified by peer review) is the author/funder, who has granted bioRxiv a license to display the preprint in perpetuity. It is made available under aCC-BY 4.0 International license.

B.1

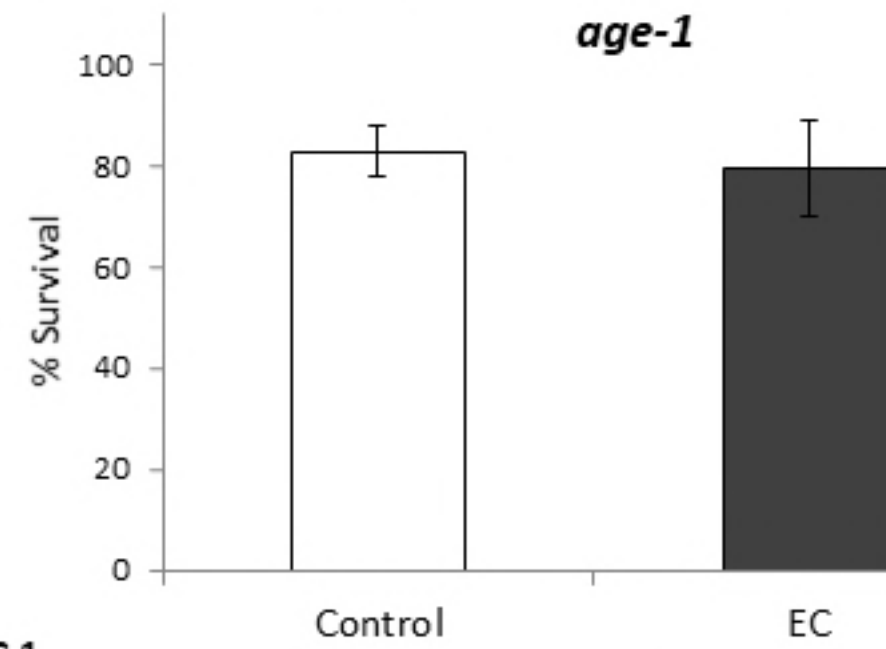

B.2

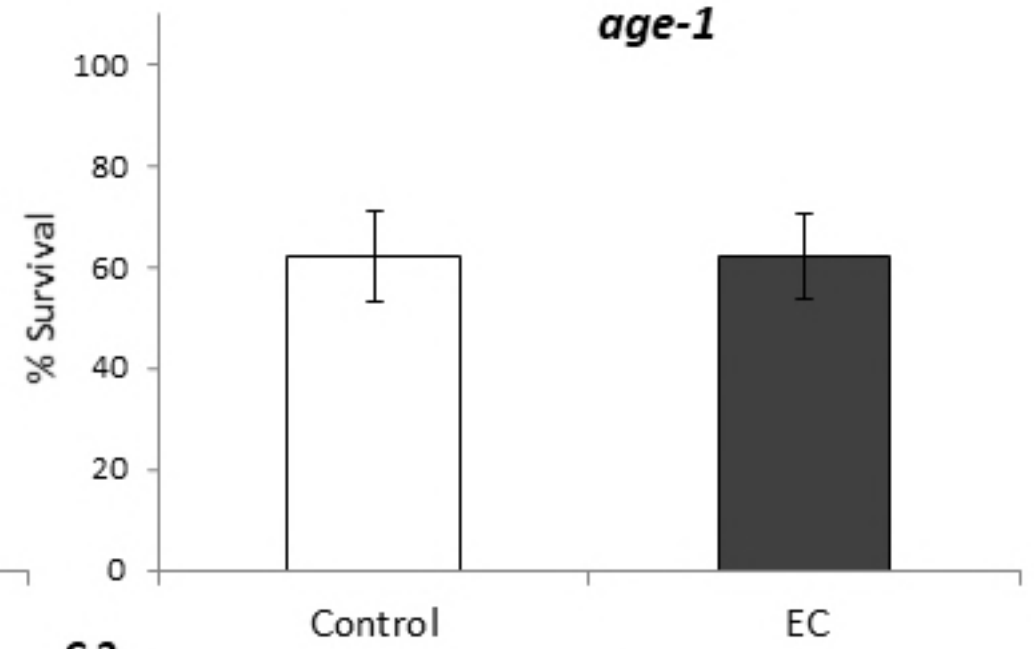

C.1

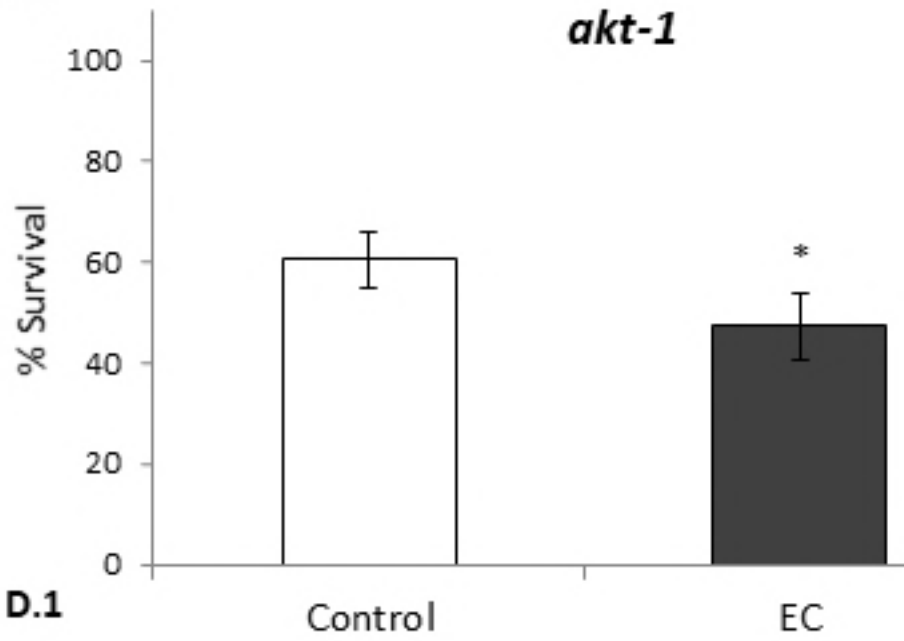

C.2

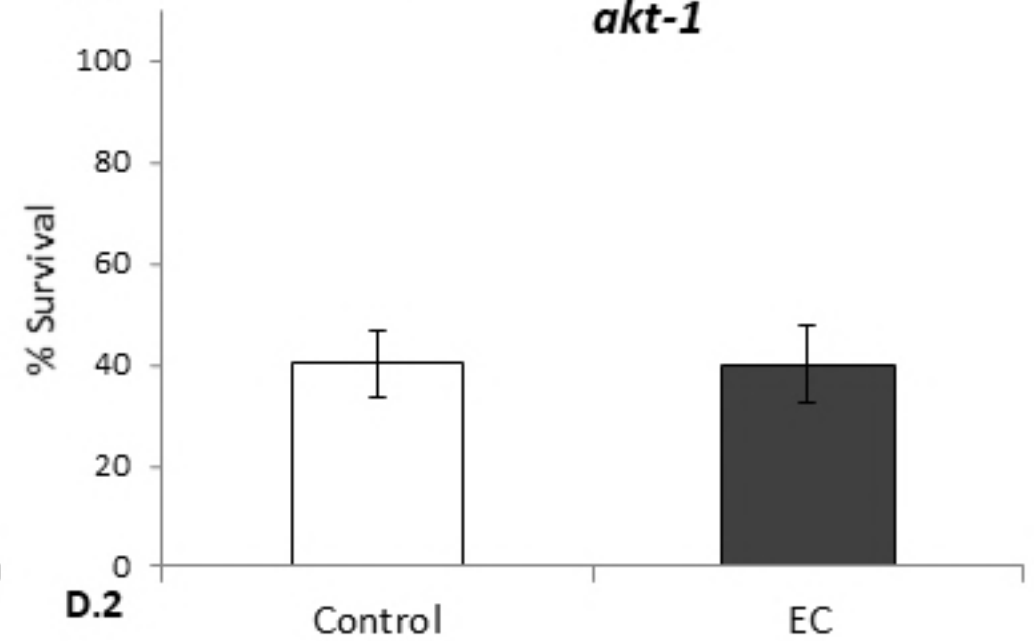

D.1

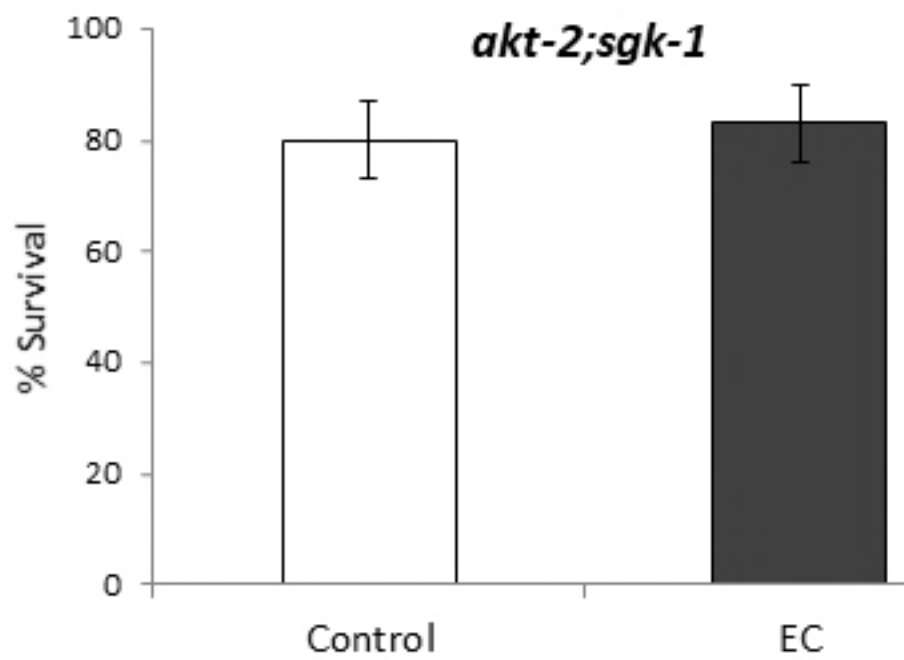

D.2

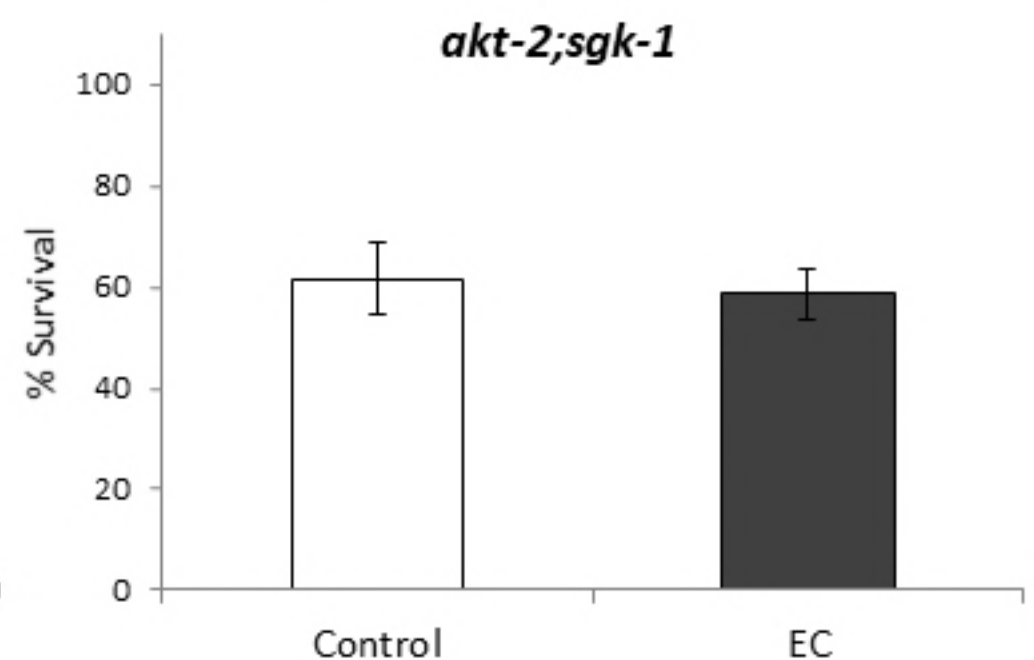

2<sup>th</sup> day of adult

9<sup>th</sup> day of adult

A.1

A.2

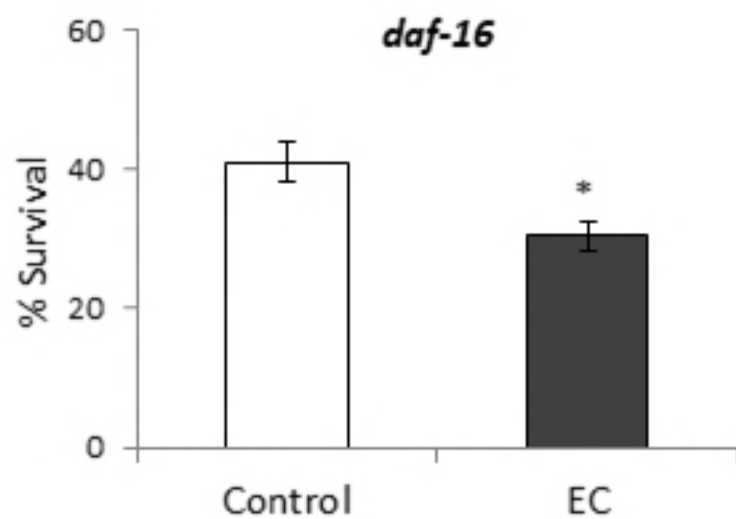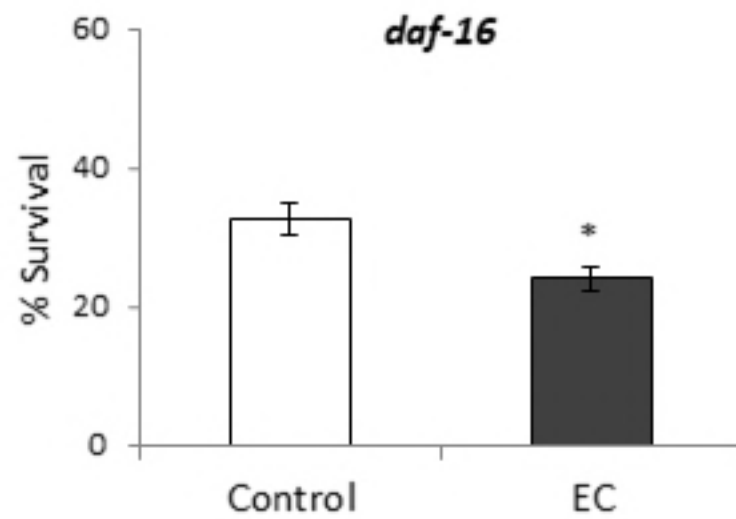

B.1

B.2

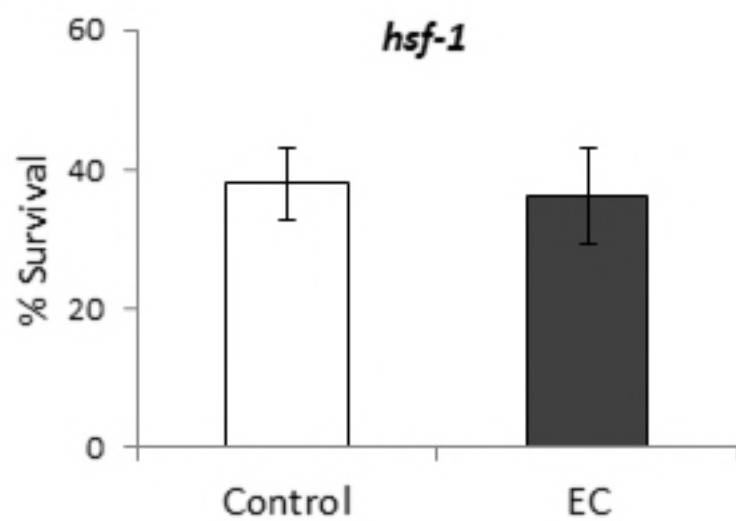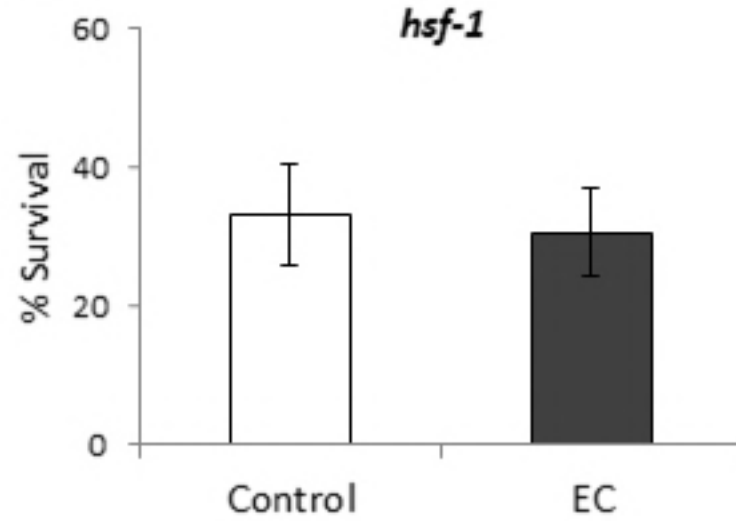

C.1

C.2

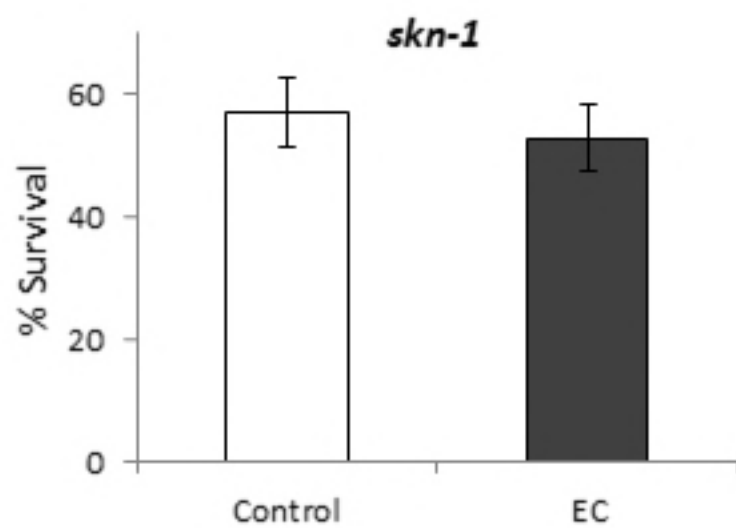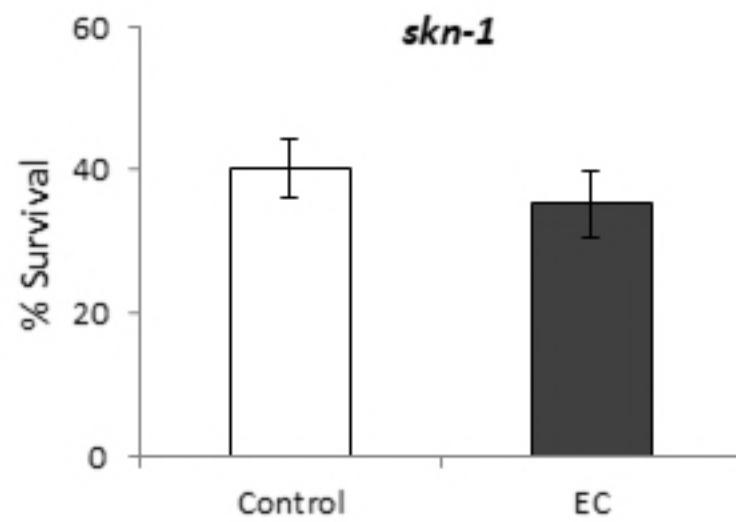

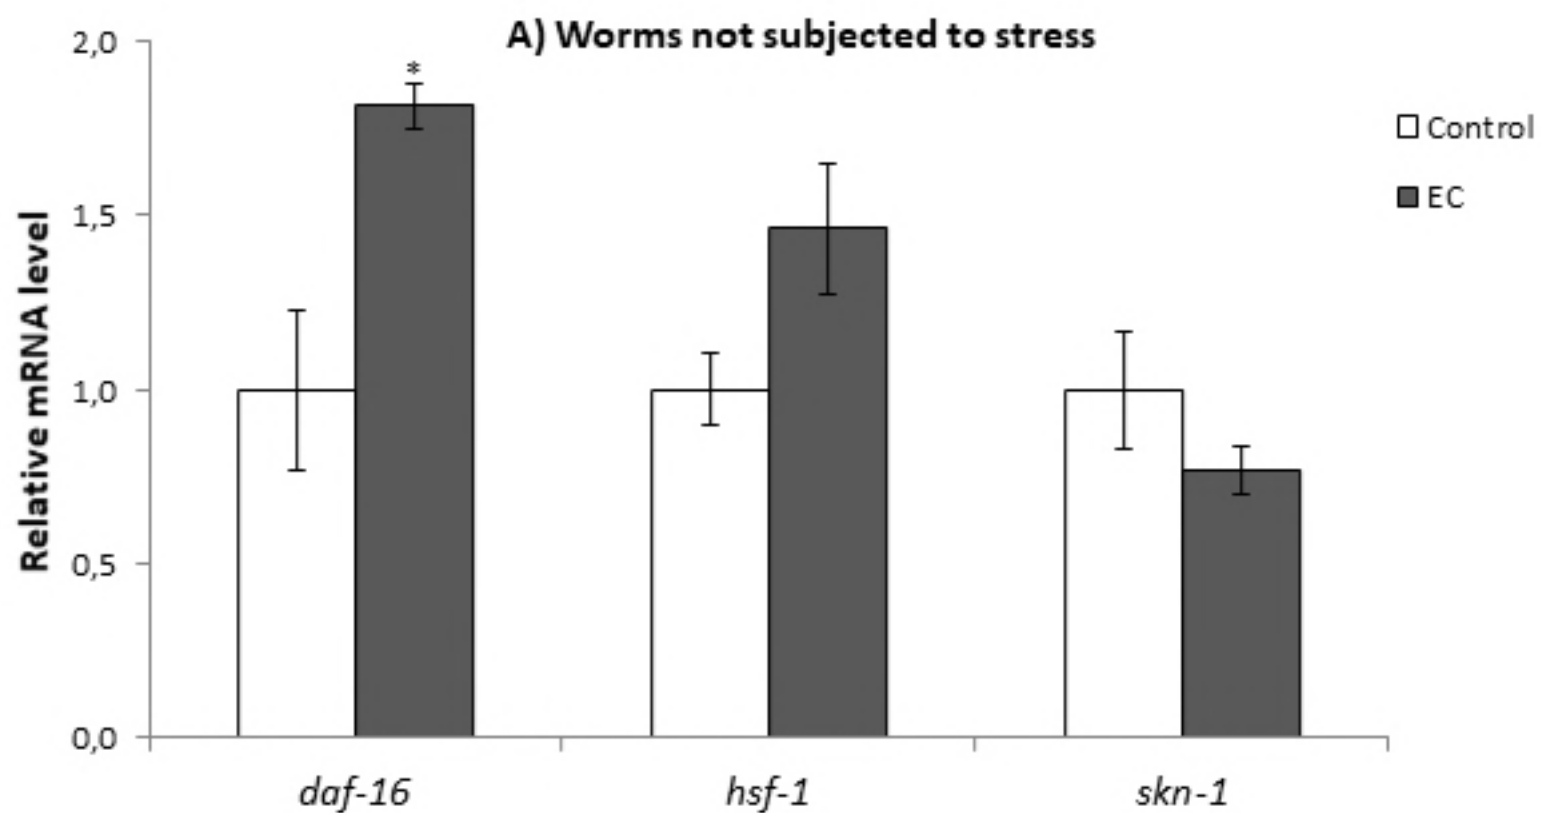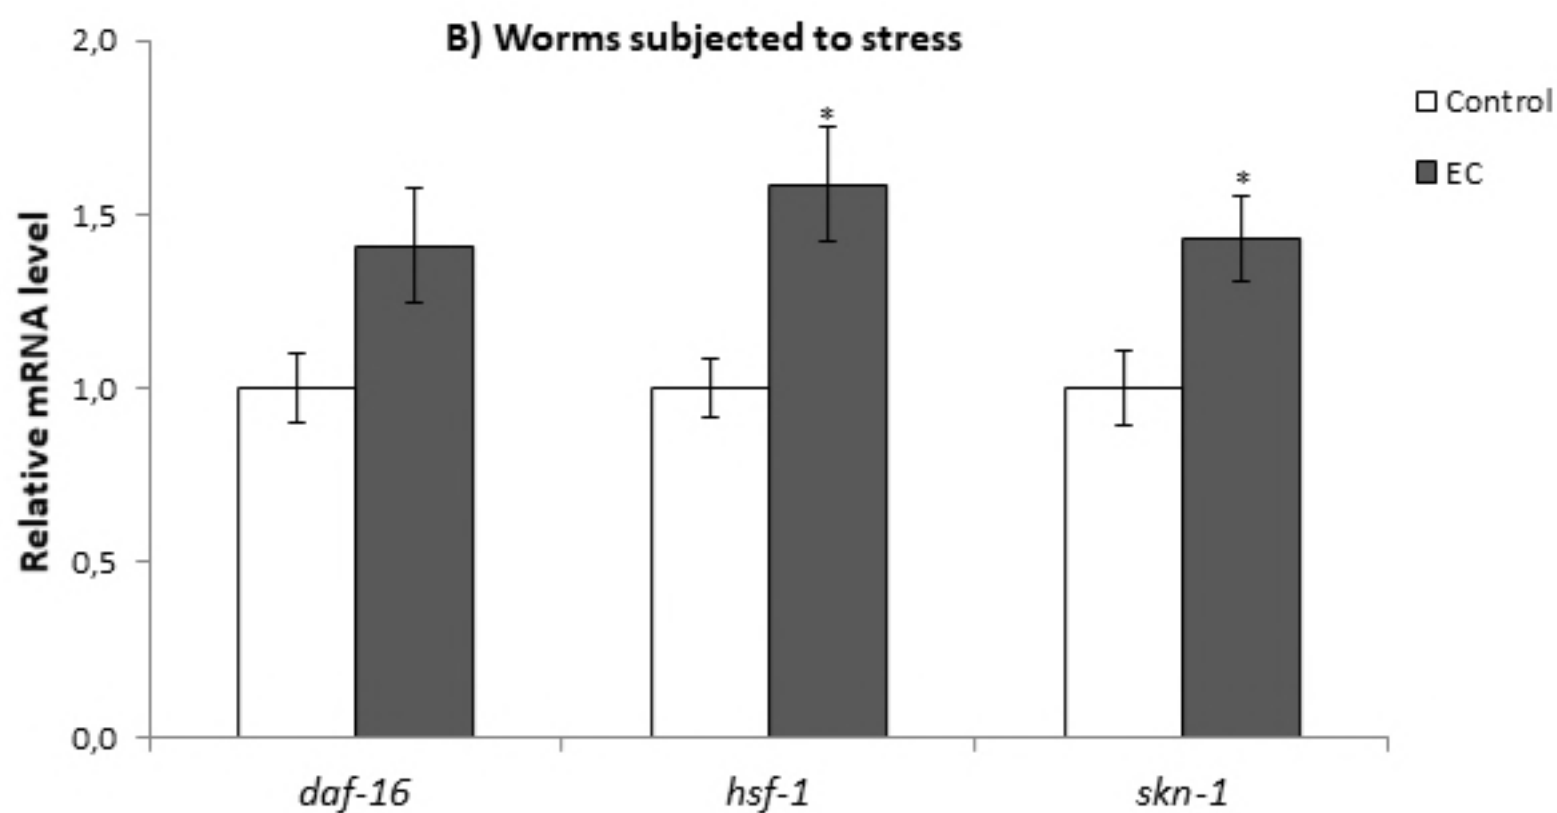

**A)***Pgst-4::gfp*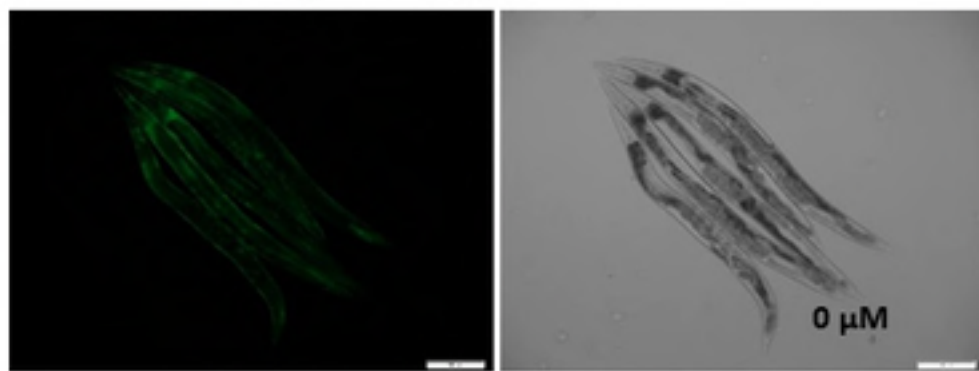*Phsp-16.2::gfp*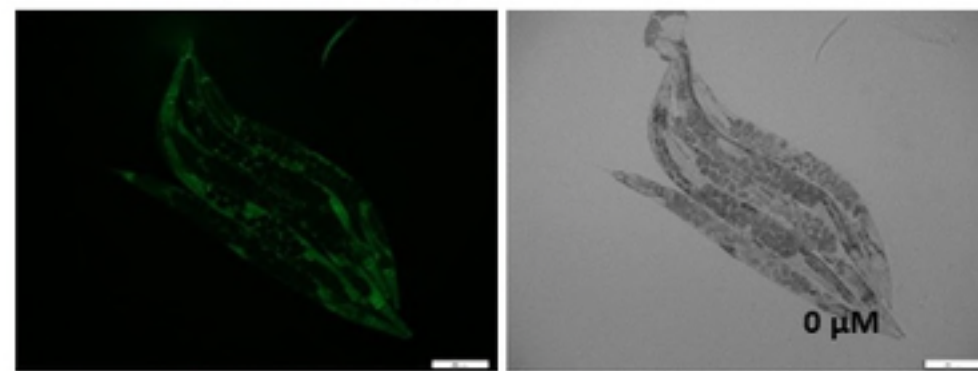

bioRxiv preprint doi: <https://doi.org/10.1101/344374>; this version posted June 11, 2018. The copyright holder for this preprint (which was not certified by peer review) is the author/funder, who has granted bioRxiv a license to display the preprint in perpetuity. It is made available under aCC-BY 4.0 International license.

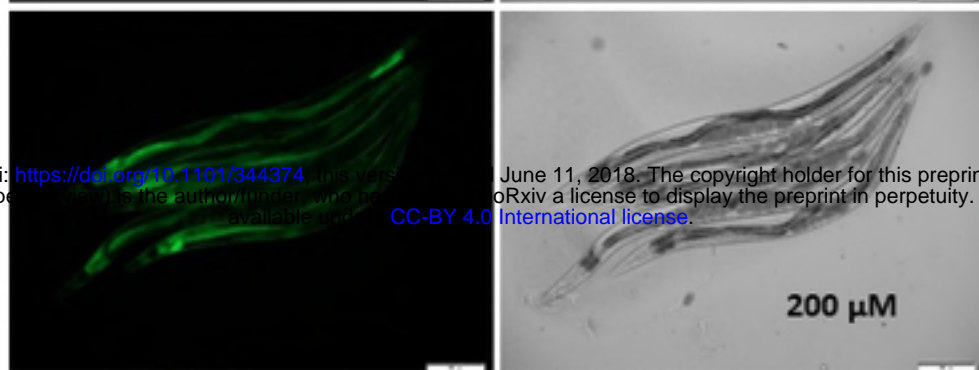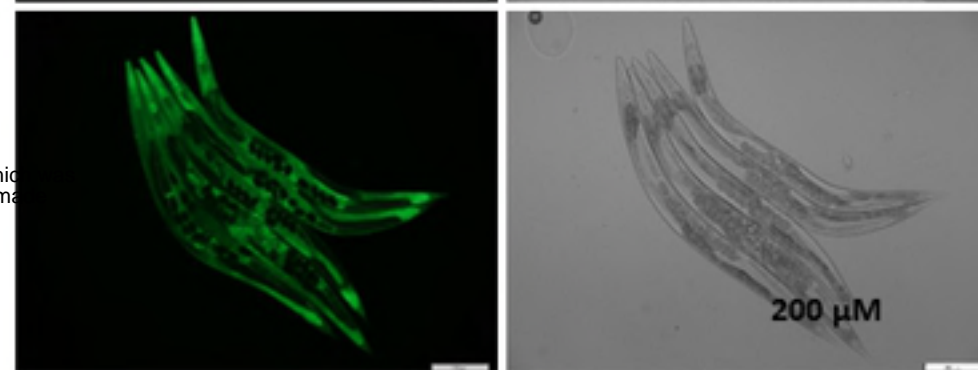*Phsp-70::gfp*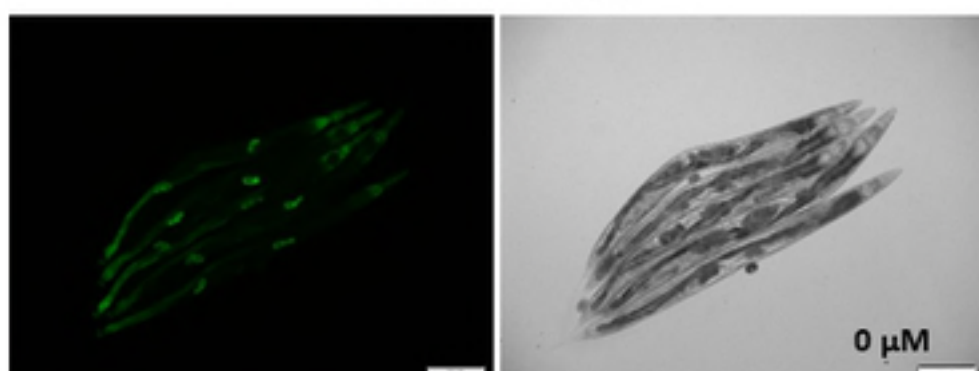*Psod-3::gfp*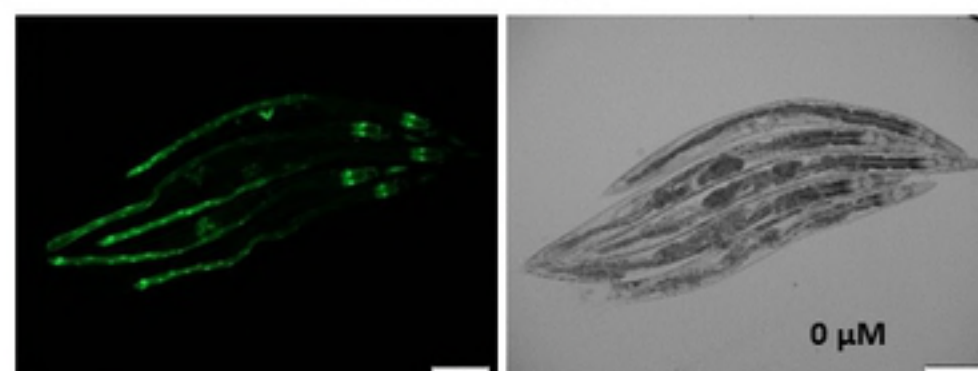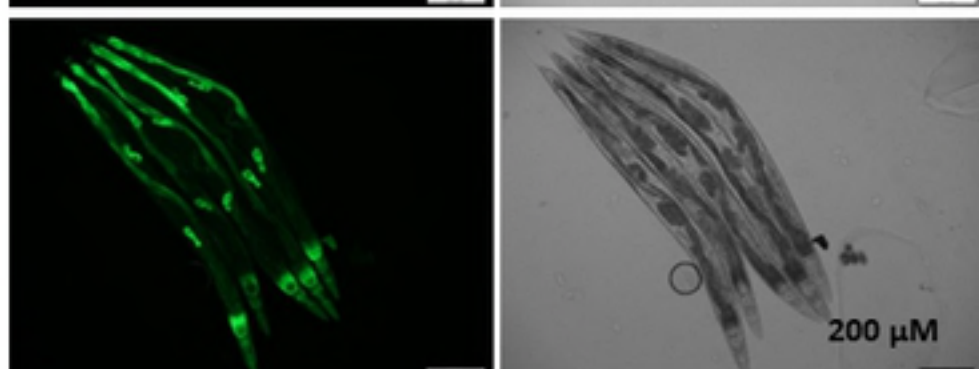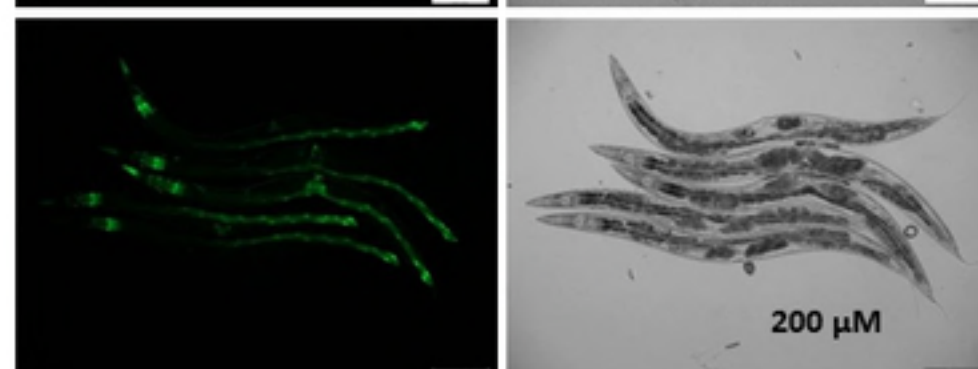**B)**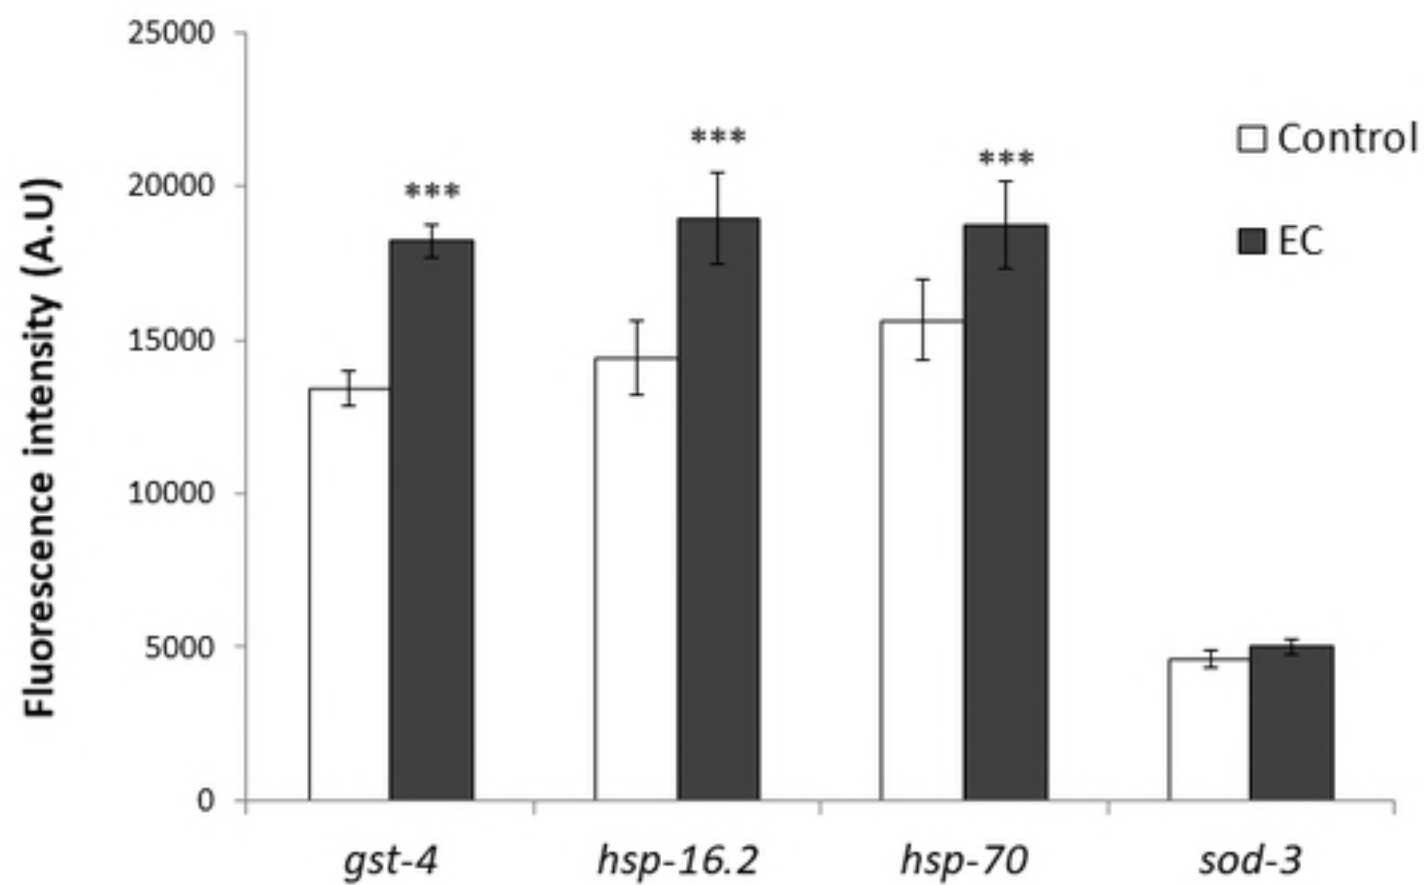



**A)****Cytosolic**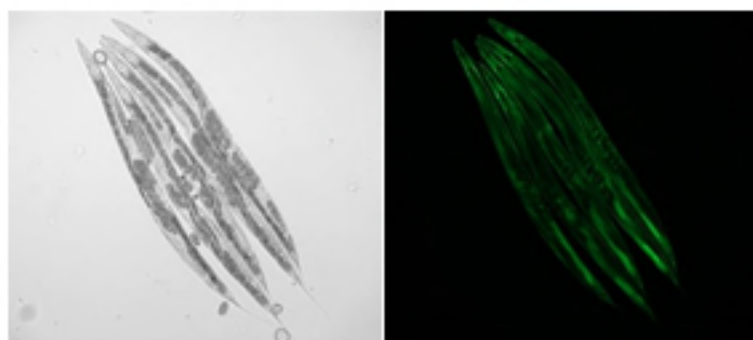**Intermediate**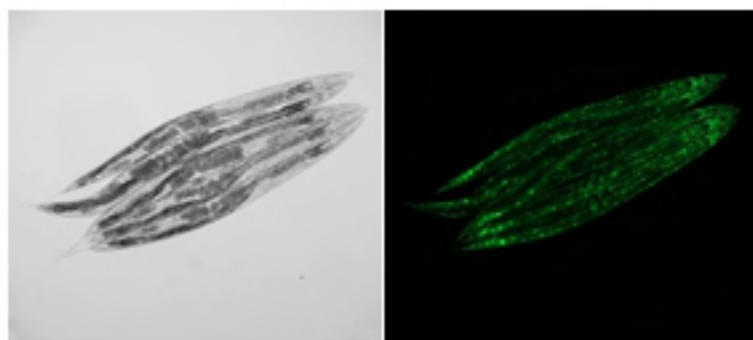**Nuclear**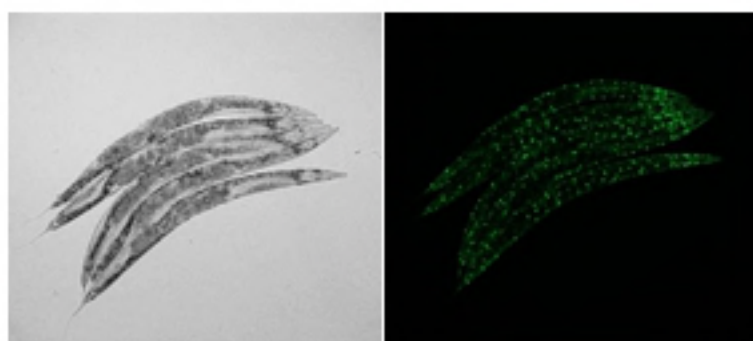**B)**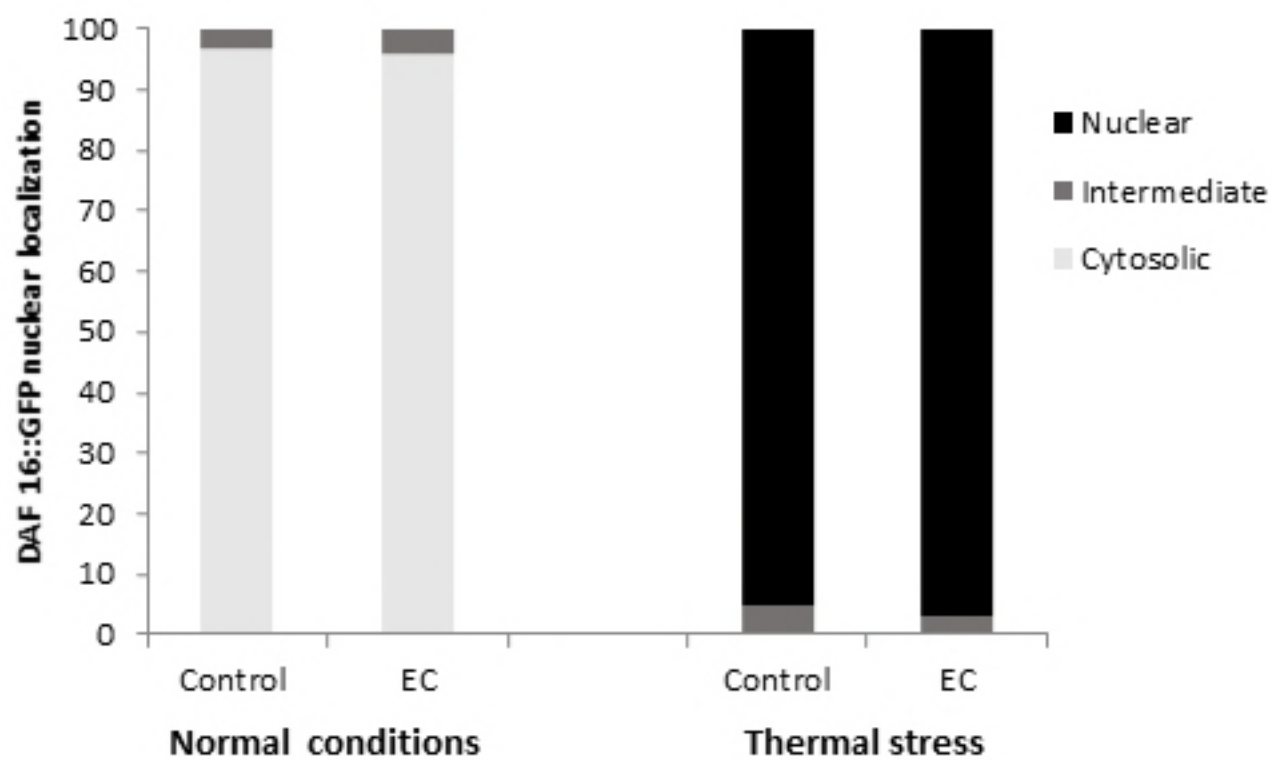

Source: https://www.biorxiv.org/content/10.1101/344374v1.full.pdf
